# Supplementary material for: Density functional theory-based investigation of HCN and NH3 formation mechanisms during phenylalanine pyrolysis
Source: Royal Society of Chemistry journal article supplement (doi:10.1039/d0ra05482h), 2020-01-01
Supplement: d0ra05482h1.pdf [file d0ra05482h1.pdf]

## Supporting Information

### Density functional theory–based investigation of HCN and NH<sub>3</sub> formation mechanisms during phenylalanine pyrolysis

Baizhong Sun<sup>a</sup>, Chuanqun Liu<sup>a</sup>, Deyong Che<sup>a</sup>, Hongpeng Liu<sup>a</sup>, Shuai Guo<sup>a,\*</sup>

<sup>a</sup> *School of Energy and Power Engineering, Northeast Electric Power University, Jilin  
132000, China*

\*Corresponding author

*E-mail address:* [guoshuaidq@126.com](mailto:guoshuaidq@126.com) (S. Guo)

## Possible NH<sub>3</sub> and HCN formation paths (S1-S3)

### S1: Possible pyrolytic paths affording NH<sub>3</sub> and HCN via 1,2-hydrogen migration reactions of Phe

As shown in Fig. S1, hydrogen transfer from C2 to C3 is accompanied by C2–C3 bond scission, with five paths of subsequent HCN generation available. Among them, paths I-3, I-4, and I-5 are preferred, featuring overall energy barriers of 369.28, 405.28, and 395.68 kJ/mol, respectively. Hence, only these three paths are discussed in detail herein.

*path I*

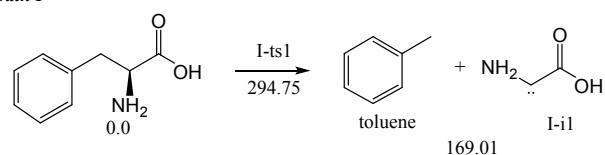

*path I-1*  $\Delta G = 489.52$

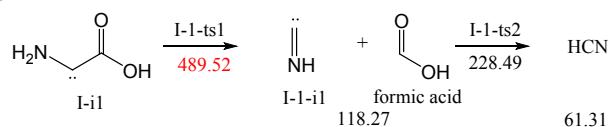

*path I-2*  $\Delta G = 469.04$

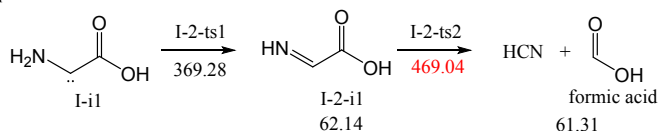

*path I-3*  $\Delta G = 369.28$

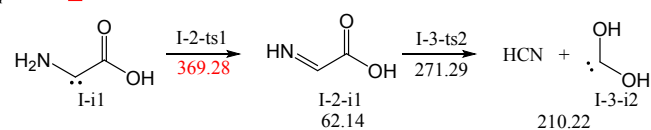

*path I-4*  $\Delta G = 405.28$

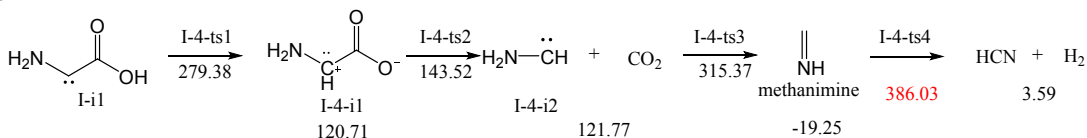

*path I-5*  $\Delta G = 395.68$

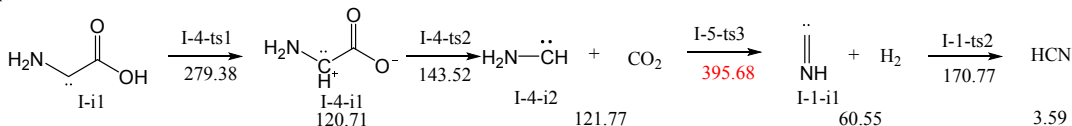

Fig. S1. Five HCN generation paths featuring hydrogen transfer from C2 to C3 as the initial step. Numbers refer to energies in kJ/mol.

In Path I-3, I-1-i1 isomerizes into I-2-i1 via a three-membered ring transition state, I-2-ts1. Then, I-2-i1 decomposes to form HCN and I-3-i2. The rate-determining step of Path I-3 corresponds to isomerization, and the overall energy barrier equals 369.28 kJ/mol.

In path I-4, decarboxylation occurs through transition states I-4-ts1 and I-4-ts2. The energy barrier of the first-step transfer of the carboxyl proton to C2 is 110.37 kJ/mol, while that of C1–C2 bond cleavage to form CO<sub>2</sub> and carbene I-4-i2 (via I-4-ts2) is 143.52 kJ/mol. Apparently, the above decarboxylation is much easier to achieve than the first step of path I-3. I-4-i2 subsequently undergoes 1,2-hydrogen migration to afford methylamine.

In path I-5, decarboxylation is also achieved via I-4-ts1 and I-4-ts2, and is followed by the decomposition of I-4-i2 to form I-1-i1 and H<sub>2</sub>. Finally, I-1-i1 affords HCN through a three-membered ring transition state, I-1-ts2. The overall energy barrier for this path equals 395.68 kJ/mol.

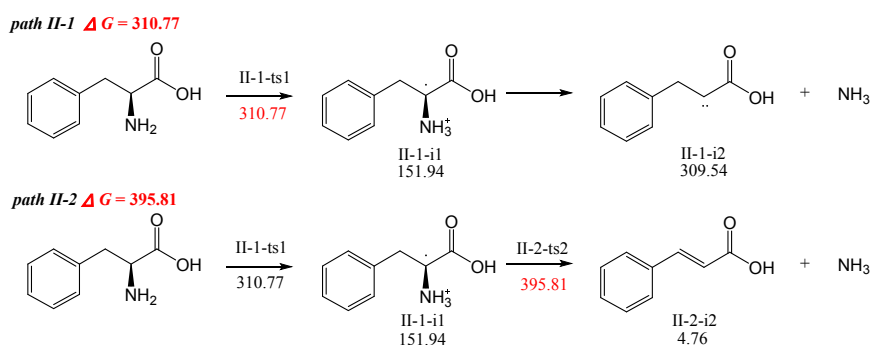

Fig. S2. NH<sub>3</sub> generation paths featuring hydrogen transfer from C2 to N4. Numbers refer to energies in kJ/mol.

Fig. S2 illustrates the two paths of  $\text{NH}_3$  formation imitated by proton transfer from C2 to N4 (energy barrier = 310.77 kJ/mol). In path II-1, II-1-i1 directly decomposes to form II-1-i2 and  $\text{NH}_3$  without a transition state, while path II-2 features hydrogen transfer from C3 to N4 through transition state II-2-ts2 (energy barrier = 243.87 kJ/mol).

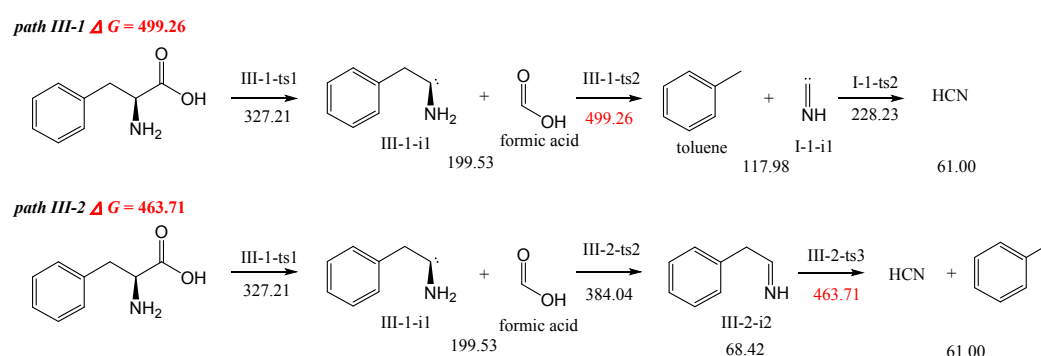

Fig. S3. HCN generation paths III-1 and III-2. Numbers refer to energies in kJ/mol.

Fig. S3 depicts HCN formation paths III-1 and III-2, both of which are initiated by 1,2-hydrogen migration followed by rearrangement to afford carbene III-1-i1 and formic acid. III-1-i1 directly fragments to toluene and I-1-i1, and I-1-i1 isomerizes to HCN. In path III-2, the above carbene isomerizes to 2-phenylethan-1-imine, which decomposes to HCN and toluene. The overall energy barrier of path III-2 (463.71 kJ/mol) is lower than that of path III-1, suggesting that the former route is feasible.

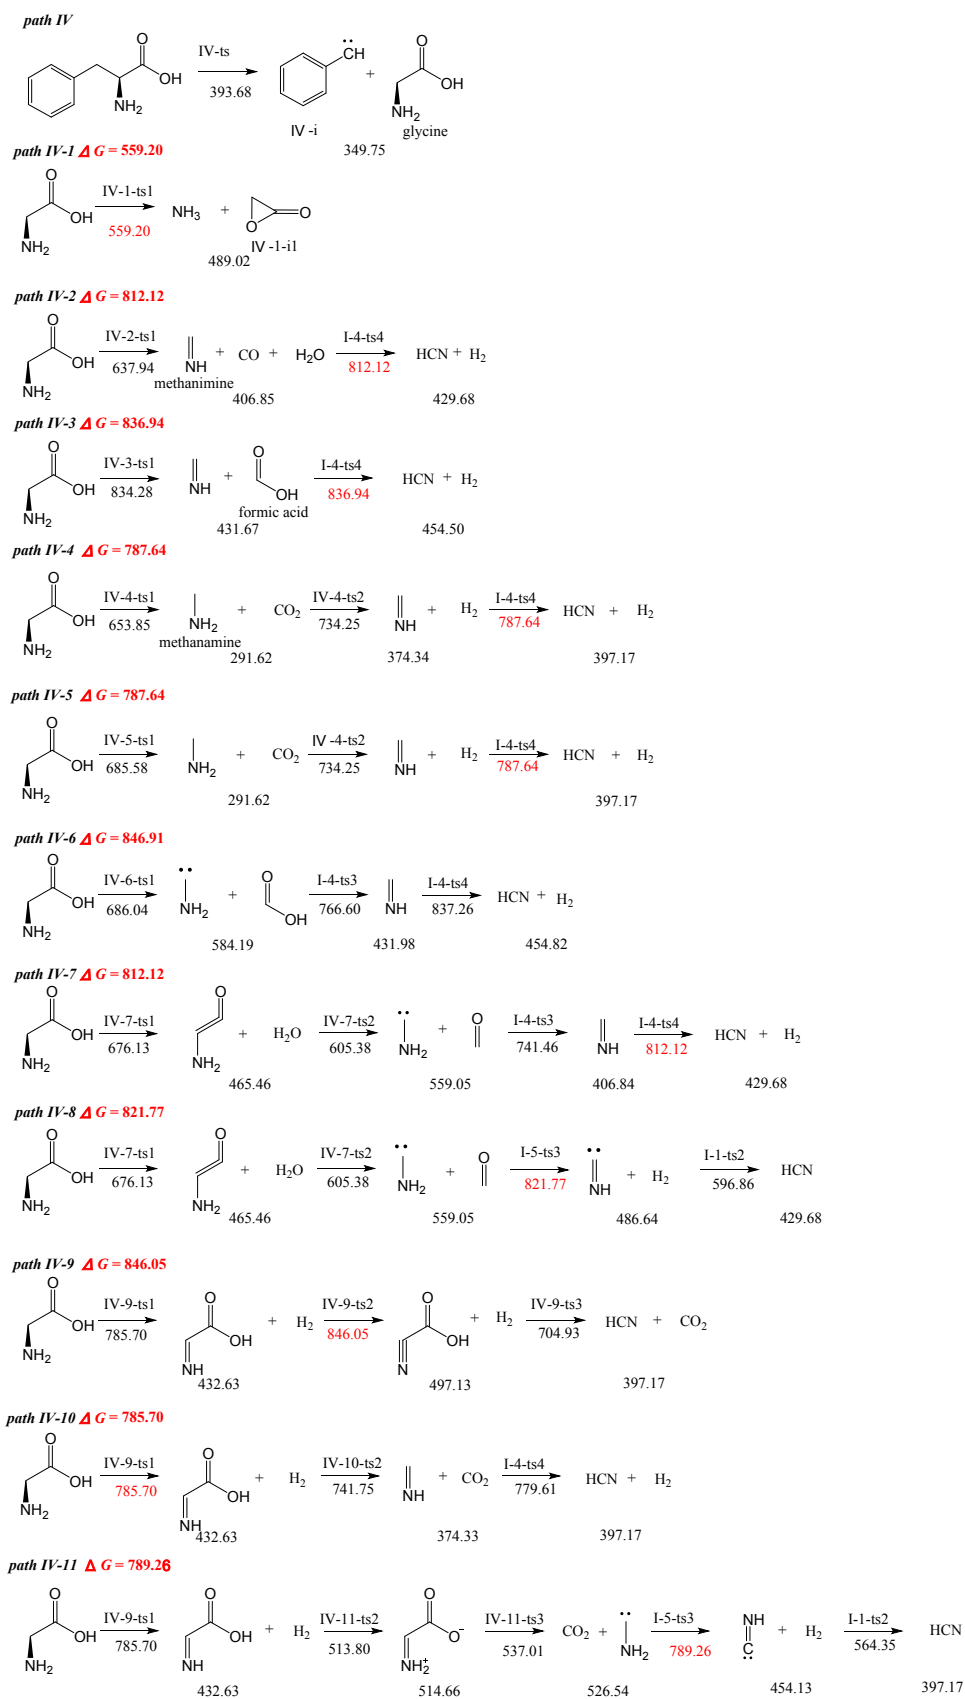

Fig. S4. Phe decomposition paths starting from the transfer of hydrogen from C3 to

C2 to form IV-i and glycine. Numbers refer to energies in kJ/mol.

Fig. S4 presents the 11 paths of Phe decomposition starting from the transfer of hydrogen from C3 to C2 to form IV-i and glycine. Among them, path IV-1 affords  $\text{NH}_3$ , and the other 10 paths generate HCN. For path IV-1, the energy barrier of the rate-determining step (209.45 kJ/mol) is much smaller than that of other paths, while the lowest energy barrier of continuous glycine decomposition is lowest for IV-1-ts1. Thus, one can conclude that this series of paths is more likely to generate  $\text{NH}_3$  than HCN.

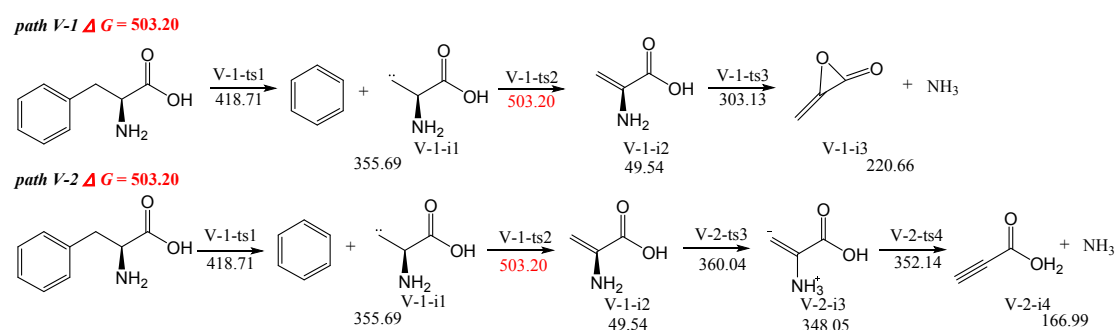

Fig. S5. Phe decomposition paths starting from the transfer of hydrogen from C3 to C7 to form benzene rings and V-1-i1. Numbers refer to energies in kJ/mol.

Fig. S5 shows Phe decomposition paths starting from the transfer of hydrogen from C3 to C7 to form benzene rings and V-1-i1 (an unstable carbene), with the corresponding energy barrier equaling 418.71 kJ/mol. Subsequently, the hydrogen atom on C2 is transferred to C3 to afford dehydroalanine featuring a double C2–C3 bond. The total Gibbs free energy of dehydroalanine and benzene (49.54 kJ/mol) is much lower than that of benzene and V-1-i1, i.e., dehydroalanine is more stable than V-1-i1. Next, dehydroalanine decomposes to generate  $\text{NH}_3$  in two ways. In path V-1, the carboxyl hydrogen is transferred to the amino group, which is directly deaminated

to form  $\text{NH}_3$  (energy barrier = 253.59 kJ/mol). In path V-2, hydrogen is transferred from C3 to N4 to afford a positively charged  $-\text{NH}_3^+$  group and negatively charged C3 (no chemical bond cleavage occurs). Subsequently, the C2–N4 bond in V-2-i3 is broken, and the C2–C3 bond changes from a double bond to a triple one to generate  $\text{NH}_3$  and propiolic acid.

For these two paths, the energy barriers of the rate-determining step are the same, but the energy barrier of V-1-ts3 is lower than that of V-2-ts3. So, path V-1 is preferred.

## S2: Possible pyrolytic paths affording $\text{NH}_3$ and HCN via 1,3-hydrogen migration reactions of Phe

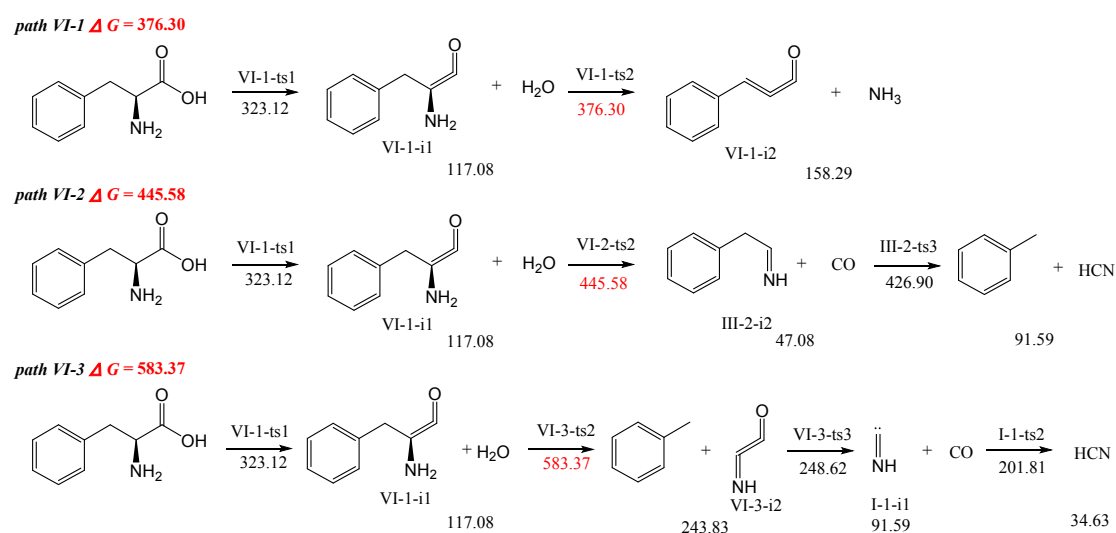

Fig. S6. Phe decomposition paths starting from a 1,2-dehydration reaction between OH and C2-H. Numbers refer to energies in kJ/mol.

Fig. S6 shows paths starting from the 1,2-dehydration of Phe between OH and C2-H via a four-membered ring transition state, I-3-ts2 (energy barrier = 323.12 kJ/mol).

The thus produced intermediate VI-1-i1 subsequently decomposes in one of the three

possible ways.

In path VI-1, VI-1-i1 decomposes through transition state VI-1-ts2 to generate VI-1-i2 (energy barrier = 259.22 kJ/mol). In this process, hydrogen on C3 is transferred to N4, the C3–C2 bond changes from a single bond to a double one, and the C2–N4 bond is broken to generate NH<sub>3</sub>. In path VI-2, VI-1-i1 undergoes decarbonylation to form 2-phenylethan-1-imine, which decomposes into toluene and HCN. In path VI-3, VI-1-i1 undergoes 1,2-hydrogen migration, the C2–C3 bond is cleaved to form toluene and VI-3-i2, and intermediate VI-3-i2 decomposes into CO and I-1-i1. Finally, I-1-i1 isomerizes to HCN. The lowest overall energy barrier of 376.3 kJ/mol is observed for path VI-1, which is therefore the most preferred one among the above three paths.

The direct decarboxylation of Phe can be achieved by elimination of CO<sub>2</sub> from the –COOH group attached to C2 and H transfer to the same (Fig. S7). This reaction is slightly exothermic and has a free Gibbs energy of activation equaling 304.85 kJ/mol (VII-ts). The thus produced phenethylamine can further decompose to afford NH<sub>3</sub> or HCN via six possible paths, among which only one (VII-1) affords NH<sub>3</sub> (and styrene) with an energy barrier of 256.46 kJ/mol. The structure of transition state VII-1-ts1 suggests that hydrogen on C3 is transferred to N4, the C2–N4 bond is broken, and the C2–C3 bond changes from a single bond to a double one. In the paths of phenethylamine decomposition to HCN, C2–C3 cleavage (paths VII-5 and VII-6) is the easiest way to generate toluene and I-4-i2 (energy barrier = 291.39 kJ/mol). Then, HCN can be generated from I-4-i2 in two ways, as shown in Fig. S1.

The overall energy barrier for HCN formation is between 395 and 426 kJ/mol, being



much higher than the energy barrier for  $\text{NH}_3$  generation. So, phenethylamine decomposition preferentially affords  $\text{NH}_3$ .

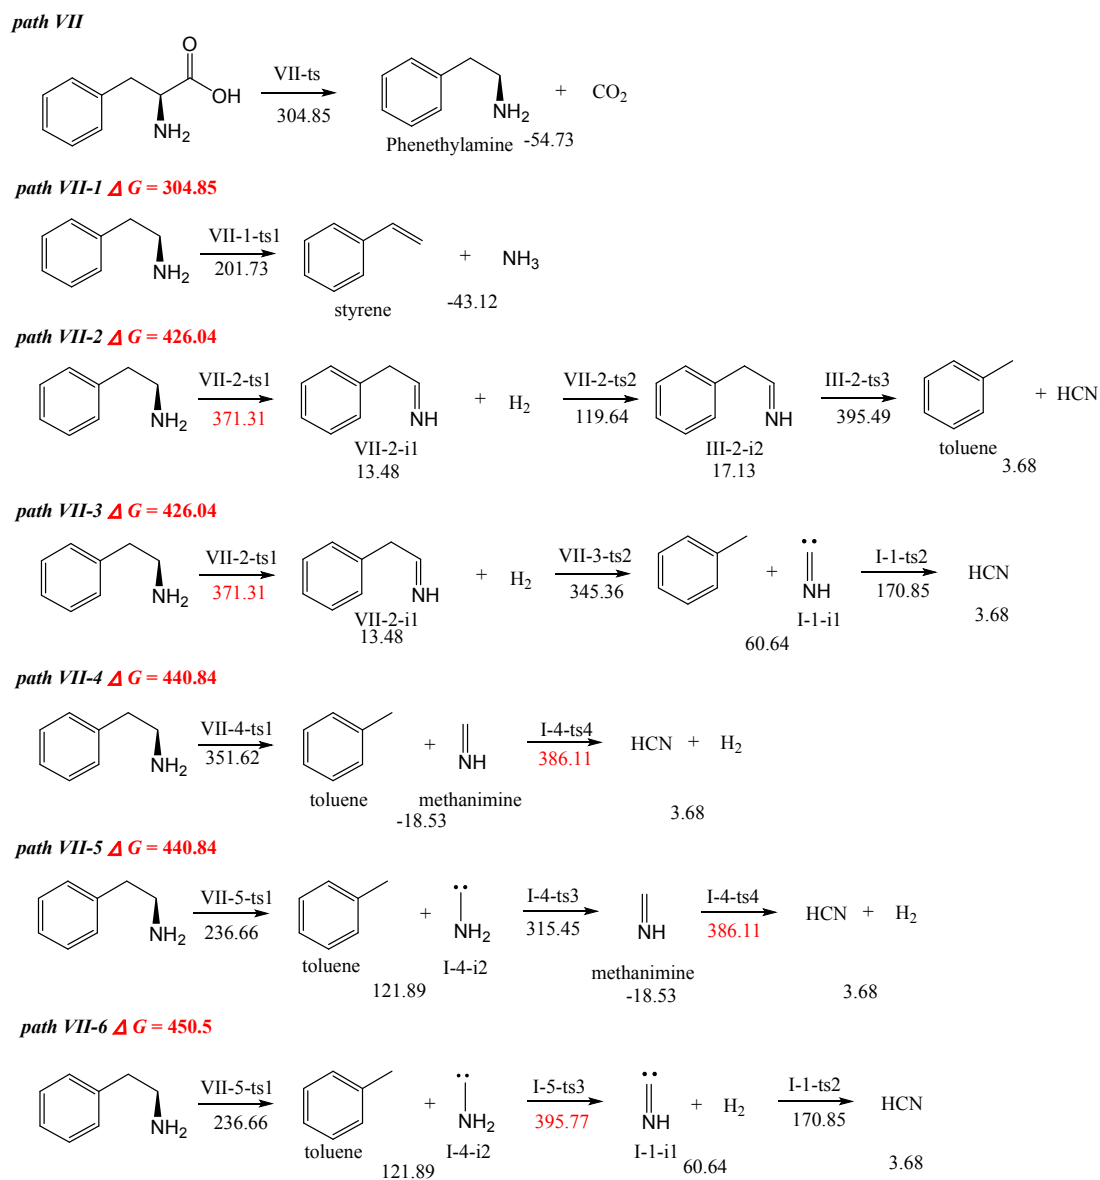

Fig. S7. Phe decomposition paths starting from direct decarboxylation. Numbers refer to energies in kJ/mol.

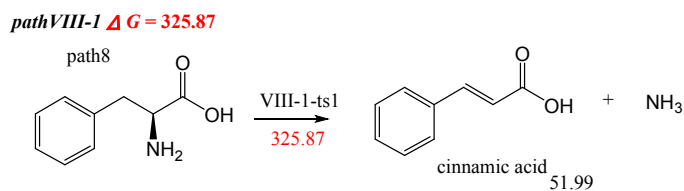

Fig. S8. Direct production of  $\text{NH}_3$  from Phe via 1,3-hydrogen migration between  $-\text{NH}_2$  and C3. Numbers refer to energies in kJ/mol.

As shown in Fig. S8,  $\text{NH}_3$  and cinnamic acid can be directly produced from Phe via 1,3-hydrogen migration between  $-\text{NH}_2$  and C3 via a four-membered ring transition state, VIII-1-ts1 (energy barrier = 325.87 kJ/mol).

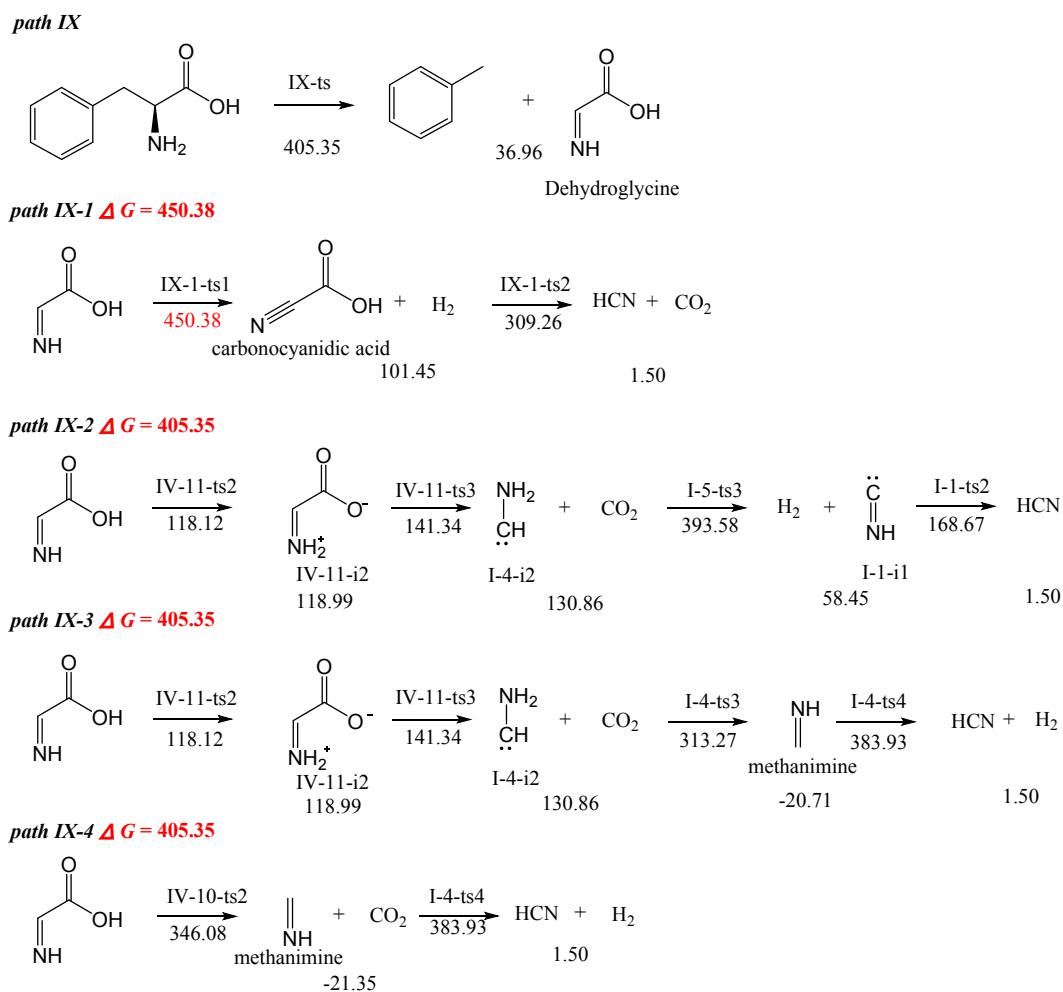

Fig. S9. Phe decomposition paths involving the initial formation of dehydroglycine.

Numbers refer to energies in kJ/mol.

As shown in Fig. S9, transfer of H on N4 to C3 affords toluene and dehydroglycine, which can subsequently afford HCN via four paths, e.g., via the formation of a zwitterion (paths IX-2 and IX-3; energy barrier = 81.16 kJ/mol). Although the electron energy of IV-11-i2 is lower than that of dehydroglycine, the free energy of the former is higher than that of dehydroglycine. Subsequently, IV-11-i2 further decomposes into I-4-i2 and CO<sub>2</sub> (energy barrier = 22.35 kJ/mol), and I-4-i2 affords HCN via two paths.

### S3: Possible pyrolytic paths affording NH<sub>3</sub> and HCN via 1,4-hydrogen migration reactions of Phe

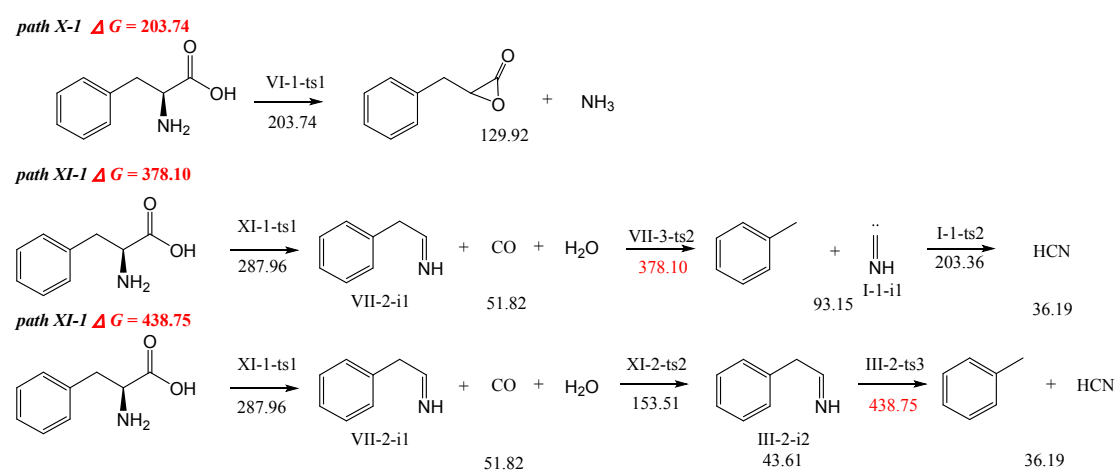

Fig. S10. Phe decomposition paths involving 1,4-hydrogen migration. Numbers refer to energies in kJ/mol.

Only three paths feature 1,4-hydrogen transfer as the initial step to generate NH<sub>3</sub> or HCN (Fig. S10). In path X-1, the carboxyl hydrogen is transferred to the amino group,

and the C2–N4 bond is cleaved to generate NH<sub>3</sub>. In paths XI-1 and XI-2, hydrogen on N4 is first transferred to O5, which is followed by decomposition into CO, H<sub>2</sub>O, and VII-2-i2. Then, VII-2-i2 undergoes the reactions described in path VII to generate HCN.

## Cartesian coordinates (X, Y, Z) and vibrational frequencies (cm<sup>-1</sup>)

**S4: Geometries at the M06-2X/6-311G(d,p) level. X, Y, Z Cartesian coordinates in Angstrom (Å) and vibrational frequencies of transient states**

### Phenylalanine (Phe)

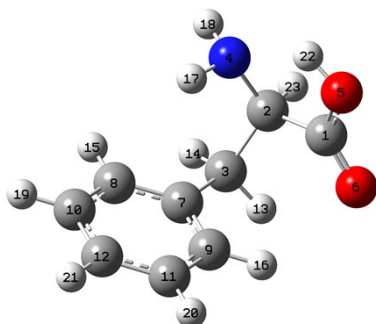

| Atomic Number | X         | Y         | Z         |
|---------------|-----------|-----------|-----------|
| 7             | 1.396786  | 1.630639  | 0.838516  |
| 6             | 0.499067  | 0.696912  | -1.355915 |
| 6             | 1.660270  | 0.822124  | -0.352643 |
| 6             | -0.779967 | 0.245635  | -0.694505 |
| 6             | -1.730008 | 1.181161  | -0.278788 |
| 6             | -1.017327 | -1.108543 | -0.441846 |
| 6             | -2.889788 | 0.779576  | 0.376908  |
| 6             | -2.176179 | -1.510576 | 0.211826  |
| 6             | -3.113930 | -0.569319 | 0.625117  |
| 1             | 0.802177  | -0.014527 | -2.125503 |
| 1             | 0.344844  | 1.668673  | -1.831717 |
| 1             | -1.565569 | 2.234346  | -0.486650 |
| 1             | -0.286137 | -1.842400 | -0.761496 |
| 1             | 0.436592  | 1.501328  | 1.147999  |
| 1             | 1.533335  | 2.617312  | 0.658553  |
| 1             | -3.619021 | 1.518921  | 0.686359  |

|   |           |           |           |
|---|-----------|-----------|-----------|
| 1 | -2.348345 | -2.564172 | 0.396800  |
| 1 | -4.016985 | -0.886446 | 1.132546  |
| 6 | 2.161264  | -0.567976 | 0.083096  |
| 8 | 2.600322  | -0.615582 | 1.336853  |
| 8 | 2.189772  | -1.509326 | -0.657709 |
| 1 | 2.424595  | 0.269787  | 1.711604  |
| 1 | 2.515855  | 1.268013  | -0.870758 |

### I -ts

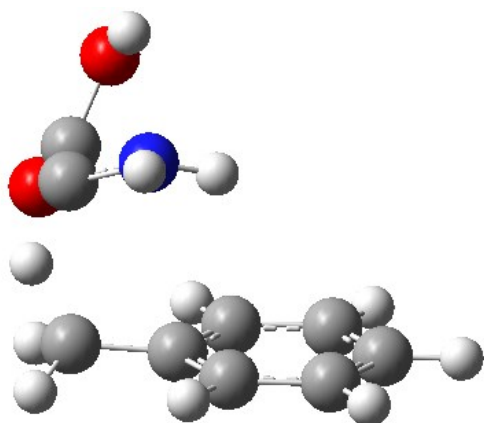

| Atomic Number | X         | Y         | Z         |
|---------------|-----------|-----------|-----------|
| 7             | -0.891661 | 1.052855  | -1.437524 |
| 6             | -0.277967 | 1.117364  | 1.474905  |
| 6             | -1.672530 | 1.018064  | -0.336116 |
| 6             | 0.836364  | 0.427209  | 0.819224  |
| 6             | 1.835239  | 1.150938  | 0.157607  |
| 6             | 0.873505  | -0.974816 | 0.756983  |
| 6             | 2.856714  | 0.498601  | -0.526506 |
| 6             | 1.890441  | -1.622806 | 0.070255  |
| 6             | 2.888730  | -0.889897 | -0.570761 |
| 1             | -0.843658 | 0.535728  | 2.193076  |
| 1             | -0.037050 | 2.124403  | 1.819026  |
| 1             | 1.817707  | 2.235563  | 0.196903  |
| 1             | 0.092751  | -1.542617 | 1.251356  |
| 1             | -0.203292 | 0.320896  | -1.617415 |
| 1             | -0.639035 | 1.951041  | -1.819686 |
| 1             | 3.629231  | 1.076353  | -1.020080 |
| 1             | 1.909455  | -2.705690 | 0.039069  |
| 1             | 3.685326  | -1.400458 | -1.098015 |
| 6             | -2.262091 | -0.292601 | 0.007471  |
| 8             | -2.726416 | -0.954848 | -1.081657 |
| 8             | -2.417125 | -0.761343 | 1.104196  |

|             |           |             |           |                     |
|-------------|-----------|-------------|-----------|---------------------|
| 1           | -2.561186 | -0.419026   | -1.865873 |                     |
| 1           | -1.270706 | 1.591016    | 0.685616  |                     |
| Vibrational |           | frequencies |           | (cm <sup>-1</sup> ) |
| -892.45     | 27.38     | 61.58       |           |                     |
| 90.58       | 111.08    | 197.74      |           |                     |
| 241.21      | 294.99    | 373.52      |           |                     |
| 384.76      | 412.58    | 417.50      |           |                     |
| 515.26      | 534.46    | 563.28      |           |                     |
| 589.29      | 631.85    | 647.65      |           |                     |
| 677.52      | 720.51    | 731.40      |           |                     |
| 763.07      | 789.88    | 831.26      |           |                     |
| 844.87      | 879.68    | 922.12      |           |                     |
| 949.62      | 1007.21   | 1016.32     |           |                     |
| 1024.17     | 1028.04   | 1061.89     |           |                     |
| 1082.20     | 1122.39   | 1171.65     |           |                     |
| 1178.73     | 1202.48   | 1206.92     |           |                     |
| 1265.18     | 1309.31   | 1334.00     |           |                     |
| 1348.80     | 1359.25   | 1419.21     |           |                     |
| 1480.72     | 1496.22   | 1539.28     |           |                     |
| 1648.74     | 1671.85   | 1674.48     |           |                     |
| 1845.29     | 2086.24   | 3113.27     |           |                     |
| 3188.88     | 3202.52   | 3209.89     |           |                     |
| 3217.83     | 3228.45   | 3237.01     |           |                     |
| 3453.79     | 3661.67   | 3854.36     |           |                     |

## Toluene

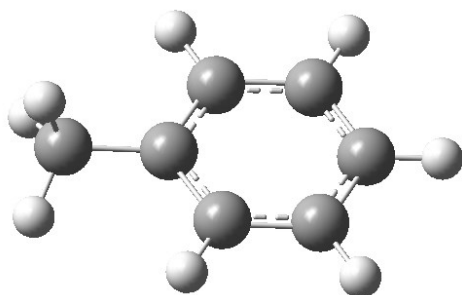

| Atomic Number | X         | Y         | Z         |
|---------------|-----------|-----------|-----------|
| 6             | -2.416037 | 0.000015  | 0.009536  |
| 6             | -0.908961 | 0.000060  | -0.011927 |
| 6             | -0.194346 | -1.198030 | -0.008851 |
| 6             | -0.194275 | 1.198076  | -0.008852 |
| 6             | 1.195798  | -1.201028 | 0.002089  |
| 6             | 1.195895  | 1.200973  | 0.002088  |
| 6             | 1.896467  | -0.000042 | 0.008319  |
| 1             | -2.817385 | 0.884953  | -0.486632 |

|   |           |           |           |
|---|-----------|-----------|-----------|
| 1 | -2.817326 | -0.883780 | -0.488724 |
| 1 | -0.734980 | -2.138886 | -0.017474 |
| 1 | -0.734832 | 2.138973  | -0.017467 |
| 1 | 1.732339  | -2.142612 | 0.001939  |
| 1 | 1.732497  | 2.142522  | 0.001944  |
| 1 | 2.979764  | -0.000084 | 0.013846  |
| 1 | -2.787317 | -0.001234 | 1.038151  |

### I -i1

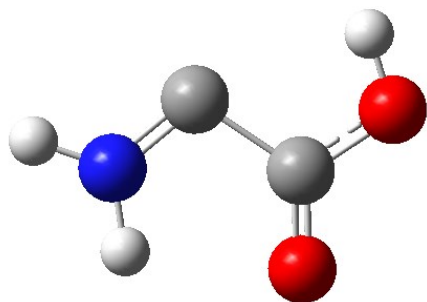

| Atomic Number | X         | Y         | Z         |
|---------------|-----------|-----------|-----------|
| 7             | -1.768136 | 0.089074  | 0.000161  |
| 6             | -0.719691 | 0.846994  | -0.000314 |
| 1             | -1.684205 | -0.934713 | 0.000509  |
| 1             | -2.697467 | 0.487518  | 0.000091  |
| 6             | 0.495063  | -0.110712 | -0.000072 |
| 8             | 1.650911  | 0.548332  | 0.000170  |
| 8             | 0.433733  | -1.308773 | -0.000102 |
| 1             | 1.429238  | 1.489507  | 0.000043  |

### I -1-ts1

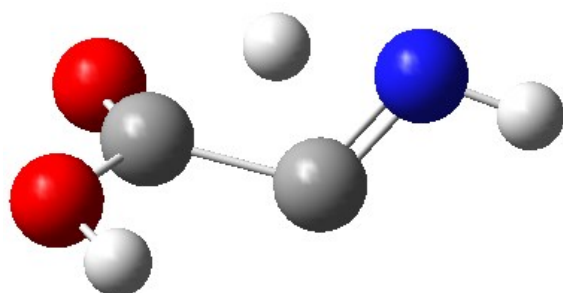

| Atomic Number | X        | Y         | Z         |
|---------------|----------|-----------|-----------|
| 7             | 1.926966 | 0.036887  | 0.254099  |
| 6             | 0.902898 | -0.290232 | -0.484055 |
| 1             | 0.725601 | 0.055775  | 0.751758  |

|   |           |           |           |
|---|-----------|-----------|-----------|
| 1 | 2.822558  | -0.243884 | -0.151718 |
| 6 | -0.541704 | 0.132650  | -0.008838 |
| 8 | -1.352365 | -0.933623 | 0.120634  |
| 8 | -0.938904 | 1.259370  | -0.031280 |
| 1 | -0.873935 | -1.730586 | -0.136212 |

Vibrational frequencies (cm<sup>-1</sup>)

|          |         |         |
|----------|---------|---------|
| -1713.06 | 115.65  | 298.58  |
| 356.54   | 435.76  | 504.59  |
| 560.12   | 615.02  | 779.17  |
| 898.66   | 1151.85 | 1278.02 |
| 1308.07  | 1575.93 | 1857.20 |
| 2186.41  | 3430.36 | 3854.26 |

### Formic acid

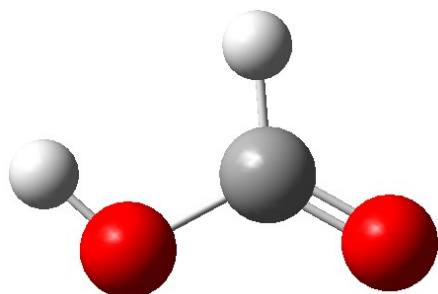

| Atomic Number | X         | Y         | Z         |
|---------------|-----------|-----------|-----------|
| 1             | 0.043580  | 1.459120  | -0.000636 |
| 6             | 0.132551  | 0.358646  | 0.000081  |
| 8             | -1.051896 | -0.278094 | -0.000186 |
| 8             | 1.167955  | -0.218845 | 0.000055  |
| 1             | -1.767356 | 0.364511  | 0.001199  |

### I -1-i1

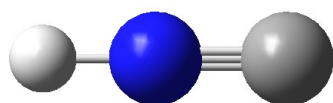

| Atomic Number | X         | Y         | Z         |
|---------------|-----------|-----------|-----------|
| 7             | -0.396836 | -0.045421 | 0.153491  |
| 6             | 0.683562  | 0.078288  | -0.264378 |
| 1             | -1.323522 | -0.151781 | 0.511833  |

### I -1-ts2



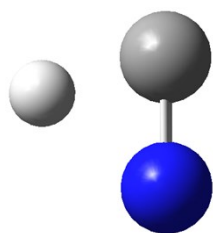

| Atomic Number                               | X         | Y         | Z        |
|---------------------------------------------|-----------|-----------|----------|
| 7                                           | 0.081140  | -0.567789 | 0.000000 |
| 6                                           | 0.081140  | 0.608995  | 0.000000 |
| 1                                           | -1.054818 | 0.320557  | 0.000000 |
| Vibrational frequencies (cm <sup>-1</sup> ) |           |           |          |
| -1157.77                                    | 2132.01   | 2713.36   |          |

### I -2-ts1

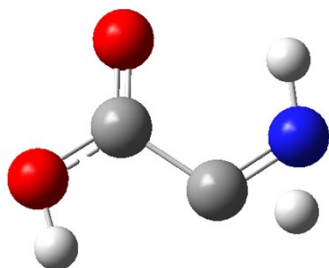

| Atomic Number                               | X         | Y         | Z         |
|---------------------------------------------|-----------|-----------|-----------|
| 7                                           | 1.872872  | -0.050198 | -0.016271 |
| 6                                           | 0.765170  | -0.740840 | -0.118788 |
| 1                                           | 1.749920  | 0.961041  | 0.196724  |
| 1                                           | 1.839152  | -1.165975 | 0.456546  |
| 6                                           | -0.508625 | 0.116612  | -0.016118 |
| 8                                           | -1.637782 | -0.582368 | 0.039476  |
| 8                                           | -0.466316 | 1.309839  | -0.002861 |
| 1                                           | -1.405657 | -1.518080 | -0.022859 |
| Vibrational frequencies (cm <sup>-1</sup> ) |           |           |           |
| -1873.31                                    | 119.19    | 299.92    |           |
| 370.16                                      | 500.17    | 612.15    |           |
| 641.44                                      | 702.31    | 859.24    |           |
| 1026.42                                     | 1229.96   | 1302.47   |           |
| 1381.15                                     | 1585.01   | 1916.95   |           |
| 2489.96                                     | 3210.72   | 3828.29   |           |

### I -2-i1

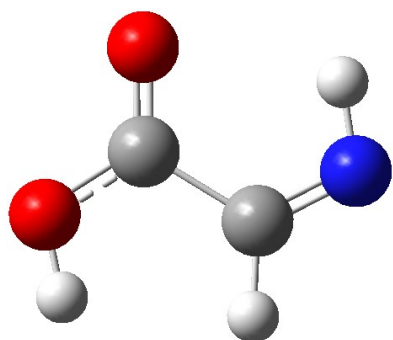

| Atomic Number | X         | Y         | Z         |
|---------------|-----------|-----------|-----------|
| 7             | 1.941591  | -0.084743 | 0.000219  |
| 6             | 0.819302  | -0.651888 | -0.000271 |
| 1             | 1.789180  | 0.932265  | 0.000587  |
| 1             | 0.768020  | -1.744517 | -0.000797 |
| 6             | -0.478818 | 0.139827  | -0.000090 |
| 8             | -1.608697 | -0.581390 | 0.000166  |
| 8             | -0.488621 | 1.331603  | -0.000121 |
| 1             | -1.412699 | -1.523894 | 0.000476  |

### I -2-ts2

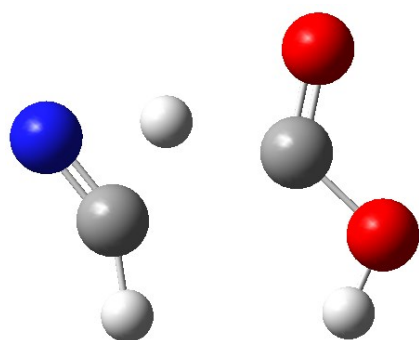

| Atomic Number | X         | Y         | Z         |
|---------------|-----------|-----------|-----------|
| 7             | -2.158871 | 0.294628  | 0.000193  |
| 6             | -1.410216 | -0.639494 | 0.000192  |
| 1             | -0.804318 | 0.474085  | 0.000044  |
| 1             | -1.245529 | -1.715019 | 0.000263  |
| 6             | 0.664975  | 0.125657  | -0.000078 |
| 8             | 1.639416  | -0.802470 | -0.000098 |
| 8             | 0.908396  | 1.295415  | -0.000194 |
| 1             | 1.250892  | -1.681995 | -0.000002 |

Vibrational frequencies (cm<sup>-1</sup>)

|          |         |         |
|----------|---------|---------|
| -2121.74 | 60.53   | 105.83  |
| 261.63   | 330.10  | 506.77  |
| 511.43   | 632.73  | 691.83  |
| 761.73   | 1027.68 | 1201.71 |

|         |         |         |
|---------|---------|---------|
| 1292.48 | 1745.15 | 1932.22 |
| 2160.83 | 3143.68 | 3895.19 |

**I -3-ts2**

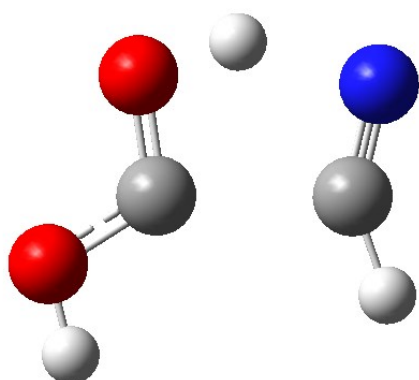

| Atomic Number                               | X         | Y         | Z         |
|---------------------------------------------|-----------|-----------|-----------|
| 7                                           | -1.947352 | 0.180857  | -0.000001 |
| 6                                           | -1.289651 | -0.802917 | 0.000000  |
| 1                                           | -0.740690 | 1.095746  | 0.000000  |
| 1                                           | -1.267042 | -1.879714 | 0.000002  |
| 6                                           | 0.599578  | -0.089555 | 0.000000  |
| 8                                           | 1.885811  | -0.359674 | 0.000000  |
| 8                                           | 0.337124  | 1.133177  | 0.000000  |
| 1                                           | 1.996154  | -1.315226 | 0.000000  |
| Vibrational frequencies (cm <sup>-1</sup> ) |           |           |           |
| -455.52                                     | 235.45    | 350.17    |           |
| 388.28                                      | 597.14    | 646.74    |           |
| 670.06                                      | 822.84    | 1009.58   |           |
| 1218.95                                     | 1227.54   | 1268.42   |           |
| 1382.23                                     | 1663.94   | 1978.09   |           |
| 2230.14                                     | 3309.23   | 3887.66   |           |

**I -3-i2**

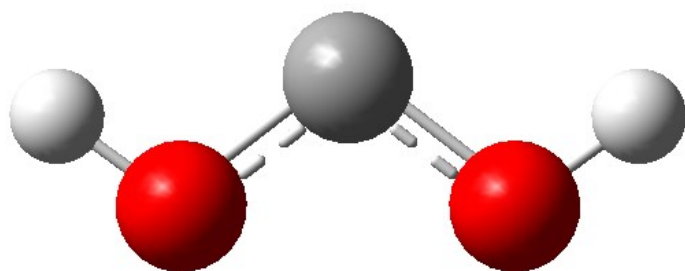

| Atomic Number | X         | Y         | Z         |
|---------------|-----------|-----------|-----------|
| 1             | -1.823757 | 0.314577  | -0.000000 |
| 6             | -0.000000 | 0.556636  | -0.000000 |
| 8             | 1.045135  | -0.248171 | 0.000000  |
| 8             | -1.045120 | -0.247947 | 0.000000  |
| 1             | 1.823638  | 0.314554  | -0.000000 |

### I -4-ts1

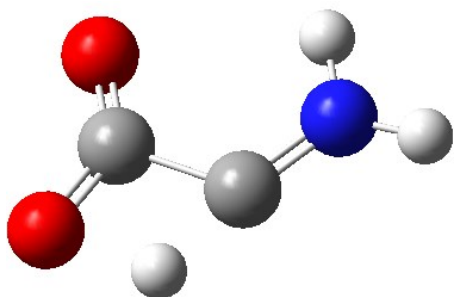

| Atomic Number | X         | Y         | Z         |
|---------------|-----------|-----------|-----------|
| 7             | 1.794683  | 0.015351  | 0.032964  |
| 6             | 0.698875  | -0.634305 | -0.082992 |
| 1             | 1.723240  | 1.037651  | 0.091316  |
| 1             | 2.711340  | -0.414236 | 0.060954  |
| 6             | -0.619251 | 0.137451  | -0.023194 |
| 8             | -1.418330 | -0.864935 | 0.048318  |
| 8             | -0.735330 | 1.339950  | -0.010412 |
| 1             | -0.245826 | -1.549868 | -0.049153 |

Vibrational frequencies (cm<sup>-1</sup>)

|          |         |         |
|----------|---------|---------|
| -1642.88 | 33.42   | 236.62  |
| 542.84   | 673.57  | 686.97  |
| 830.29   | 883.54  | 905.29  |
| 1123.24  | 1265.18 | 1355.89 |
| 1550.80  | 1701.69 | 1871.24 |
| 2148.19  | 3400.40 | 3624.73 |

### I -4-i1

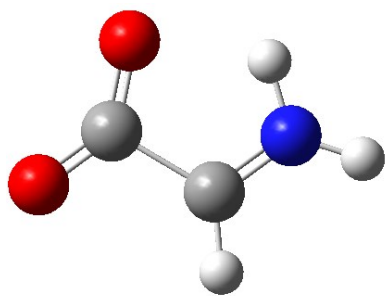

| Atomic Number | X         | Y         | Z         |
|---------------|-----------|-----------|-----------|
| 7             | 1.717491  | 0.008530  | 0.000016  |
| 6             | 0.688873  | -0.742800 | -0.000026 |
| 1             | 1.430155  | 1.009473  | -0.000057 |
| 1             | 2.681851  | -0.300573 | 0.000046  |
| 6             | -0.688452 | 0.072101  | -0.000011 |
| 8             | -1.667925 | -0.648609 | 0.000012  |
| 8             | -0.447310 | 1.283756  | 0.000003  |
| 1             | 0.784909  | -1.825589 | 0.000000  |

### I -4-ts2

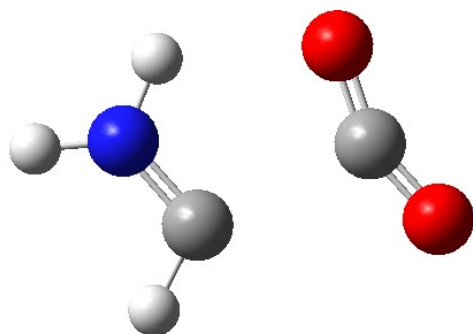

| Vibrational | frequencies |         | (cm <sup>-1</sup> ) |
|-------------|-------------|---------|---------------------|
| -206.14     | 715.37      | 1521.92 |                     |
| 106.13      | 883.66      | 1685.17 |                     |
| 248.36      | 1045.97     | 2274.57 |                     |
| 386.37      | 1156.34     | 3061.90 |                     |
| 392.12      | 1337.10     | 3445.31 |                     |
| 624.02      | 1379.56     | 3564.27 |                     |

I -4-i2

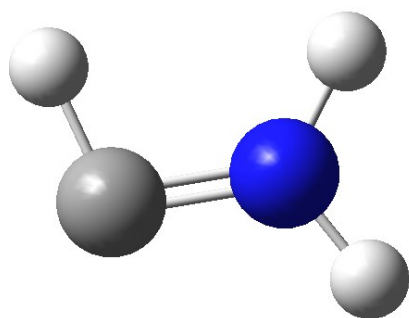

| Atomic Number | X         | Y         | Z         |
|---------------|-----------|-----------|-----------|
| 7             | 0.525578  | 0.024110  | 0.000006  |
| 6             | -0.765974 | -0.191655 | -0.000008 |
| 1             | 1.161077  | -0.764149 | 0.000020  |
| 1             | 0.988594  | 0.931577  | 0.000005  |
| 1             | -1.232877 | 0.813733  | -0.000022 |

### I -4-ts3

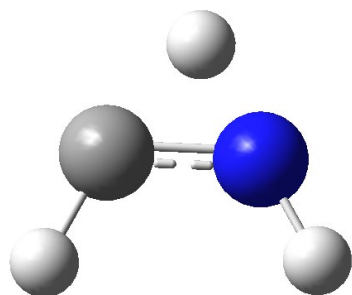

| Atomic Number | X         | Y         | Z         |
|---------------|-----------|-----------|-----------|
| 7             | 0.614012  | 0.026287  | -0.064369 |
| 6             | -0.709043 | 0.083721  | -0.051818 |
| 1             | -1.243712 | -0.856479 | 0.176531  |
| 1             | 1.099277  | -0.840266 | 0.217207  |
| 1             | 0.100611  | 1.010414  | 0.367750  |

Vibrational frequencies (cm<sup>-1</sup>)

|          |         |         |
|----------|---------|---------|
| -1968.19 | 477.43  | 1143.72 |
| 1189.16  | 1396.50 | 1509.61 |
| 2544.59  | 2955.45 | 3278.64 |

### I -4-i3

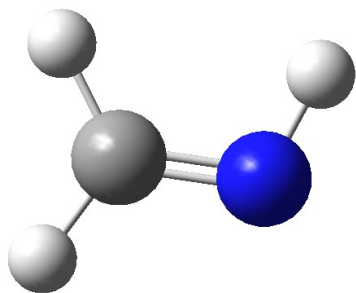

| Atomic Number | X         | Y         | Z         |
|---------------|-----------|-----------|-----------|
| 7             | 0.665705  | -0.154487 | 0.000036  |
| 6             | -0.583338 | 0.028682  | -0.000101 |
| 1             | 1.154590  | 0.743029  | -0.000048 |
| 1             | -1.073508 | 1.007597  | 0.000235  |
| 1             | -1.240987 | -0.841310 | 0.000172  |

### I -4-ts4

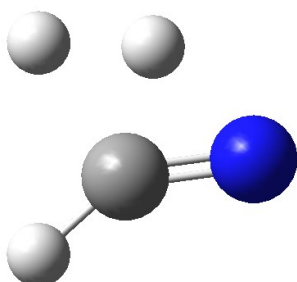

| Atomic Number | X         | Y         | Z         |
|---------------|-----------|-----------|-----------|
| 7             | 0.867103  | -0.430525 | -0.002261 |
| 6             | -0.290706 | -0.066927 | 0.001720  |
| 1             | 0.461593  | 0.920926  | -0.004769 |
| 1             | -0.491713 | 1.410537  | -0.001537 |
| 1             | -1.335971 | -0.383056 | 0.007000  |

Vibrational frequencies (cm<sup>-1</sup>)

|          |         |         |
|----------|---------|---------|
| -2457.95 | 505.85  | 907.81  |
| 915.67   | 1323.64 | 1650.47 |
| 1895.55  | 2371.18 | 3110.74 |

### I -5-ts3

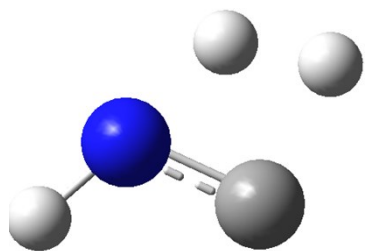

| Atomic Number                               | X         | Y         | Z         |
|---------------------------------------------|-----------|-----------|-----------|
| 7                                           | -0.591100 | 0.157020  | -0.000008 |
| 6                                           | 0.616656  | -0.357831 | 0.000007  |
| 1                                           | -1.327913 | -0.547897 | -0.000021 |
| 1                                           | 0.399344  | 0.966110  | 0.000011  |
| 1                                           | 1.366333  | 0.629630  | 0.000022  |
| Vibrational frequencies (cm <sup>-1</sup> ) |           |           |           |
| -1810.47                                    | 74.04     | 1003.67   |           |
| 1180.33                                     | 1341.79   | 1526.54   |           |
| 2183.78                                     | 2330.92   | 3466.46   |           |



## II -1-ts1

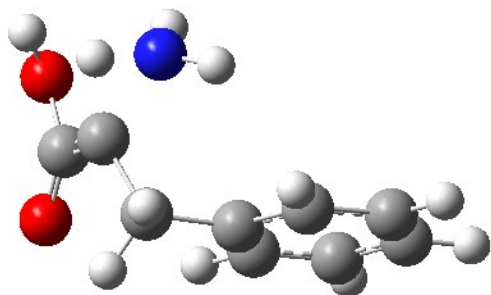

| Atomic Number                               | X         | Y         | Z         |
|---------------------------------------------|-----------|-----------|-----------|
| 7                                           | -1.160632 | 1.512255  | -1.040753 |
| 6                                           | -0.411677 | 0.760730  | 1.297242  |
| 6                                           | -1.557654 | 0.793921  | 0.317874  |
| 6                                           | 0.865765  | 0.245947  | 0.667776  |
| 6                                           | 1.936635  | 1.104203  | 0.418645  |
| 6                                           | 0.961111  | -1.086804 | 0.252273  |
| 6                                           | 3.084658  | 0.647916  | -0.227713 |
| 6                                           | 2.105834  | -1.543104 | -0.386875 |
| 6                                           | 3.170376  | -0.677110 | -0.631781 |
| 1                                           | -0.731003 | 0.101467  | 2.107126  |
| 1                                           | -0.231856 | 1.746880  | 1.735802  |
| 1                                           | 1.881418  | 2.136095  | 0.754719  |
| 1                                           | 0.130496  | -1.757592 | 0.444938  |
| 1                                           | -1.349561 | 0.933636  | -1.854333 |
| 1                                           | -0.204700 | 1.854509  | -1.001379 |
| 1                                           | 3.909697  | 1.327135  | -0.407776 |
| 1                                           | 2.171633  | -2.580415 | -0.693536 |
| 1                                           | 4.062010  | -1.037905 | -1.130260 |
| 6                                           | -2.306785 | -0.421829 | 0.093813  |
| 8                                           | -3.080734 | -0.442933 | -1.057632 |
| 8                                           | -2.314566 | -1.384214 | 0.815991  |
| 1                                           | -3.470806 | 0.424819  | -1.199140 |
| 1                                           | -1.970089 | 1.939543  | -0.345279 |
| Vibrational frequencies (cm <sup>-1</sup> ) |           |           |           |
| -1644.93                                    | 41.66     | 67.35     |           |
| 87.98                                       | 122.77    | 181.53    |           |
| 207.50                                      | 239.46    | 279.95    |           |
| 363.70                                      | 372.51    | 416.74    |           |
| 419.91                                      | 483.47    | 538.54    |           |
| 565.93                                      | 630.94    | 635.48    |           |
| 718.77                                      | 728.72    | 766.57    |           |
| 784.20                                      | 836.99    | 878.42    |           |

|         |         |         |
|---------|---------|---------|
| 887.17  | 924.07  | 951.62  |
| 983.35  | 1010.74 | 1018.08 |
| 1029.23 | 1037.70 | 1063.28 |
| 1106.98 | 1127.80 | 1176.64 |
| 1189.47 | 1207.69 | 1221.17 |
| 1232.45 | 1306.80 | 1341.71 |
| 1363.44 | 1369.53 | 1454.81 |
| 1479.05 | 1495.79 | 1538.19 |
| 1560.93 | 1656.39 | 1677.76 |
| 1838.20 | 2468.57 | 3065.16 |
| 3127.76 | 3175.40 | 3199.05 |
| 3206.37 | 3214.15 | 3225.97 |
| 3487.87 | 3613.77 | 3884.33 |

## II -1-i1

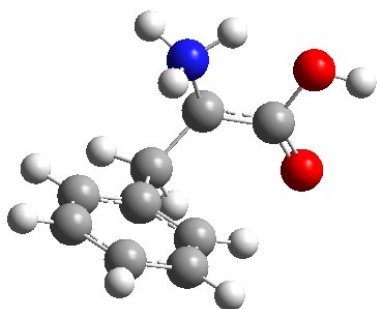

| Atomic Number | X         | Y         | Z         |
|---------------|-----------|-----------|-----------|
| 7             | 1.179616  | -1.452587 | -1.006782 |
| 6             | 0.387952  | -0.787056 | 1.268472  |
| 6             | 1.503710  | -0.773432 | 0.271078  |
| 6             | -0.902247 | -0.260489 | 0.665888  |
| 6             | -1.992104 | -1.092559 | 0.415844  |
| 6             | -0.970948 | 1.077690  | 0.258322  |
| 6             | -3.136873 | -0.602872 | -0.214571 |
| 6             | -2.111314 | 1.568575  | -0.360858 |
| 6             | -3.198934 | 0.728204  | -0.601316 |
| 1             | 0.711680  | -0.139252 | 2.085831  |
| 1             | 0.210987  | -1.781931 | 1.696357  |
| 1             | -1.953197 | -2.130059 | 0.735856  |
| 1             | -0.115117 | 1.720691  | 0.443445  |
| 1             | 1.876555  | -1.139735 | -1.692107 |
| 1             | 0.239898  | -1.201179 | -1.352670 |
| 1             | -3.977656 | -1.262208 | -0.396608 |
| 1             | -2.157787 | 2.610235  | -0.656486 |

|   |           |           |           |
|---|-----------|-----------|-----------|
| 1 | -4.087961 | 1.114086  | -1.085563 |
| 6 | 2.346506  | 0.333542  | 0.121255  |
| 8 | 3.007036  | 0.337050  | -1.117280 |
| 8 | 2.574071  | 1.235609  | 0.911799  |
| 1 | 3.570465  | 1.117404  | -1.092706 |
| 1 | 1.221476  | -2.470838 | -0.938701 |

## II -1-i2

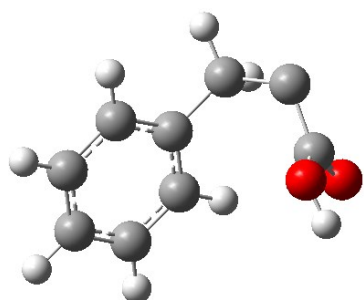

| Atomic Number | X         | Y         | Z         |
|---------------|-----------|-----------|-----------|
| 6             | 0.725764  | 1.455843  | -0.739388 |
| 6             | 2.006119  | 1.166015  | -0.103401 |
| 6             | -0.516187 | 0.652630  | -0.424142 |
| 6             | -1.526283 | 1.236277  | 0.336644  |
| 6             | -0.661911 | -0.666659 | -0.856190 |
| 6             | -2.666283 | 0.512970  | 0.669314  |
| 6             | -1.803255 | -1.387432 | -0.525882 |
| 6             | -2.806917 | -0.800694 | 0.238015  |
| 1             | 1.128628  | 1.172529  | -1.746717 |
| 1             | 0.529638  | 2.526863  | -0.816328 |
| 1             | -1.418400 | 2.262229  | 0.672383  |
| 1             | 0.119836  | -1.129123 | -1.448885 |
| 1             | -3.444124 | 0.977178  | 1.263715  |
| 1             | -1.910696 | -2.408409 | -0.872070 |
| 1             | -3.696323 | -1.364376 | 0.492725  |
| 6             | 2.203264  | -0.230551 | 0.244824  |
| 8             | 2.010159  | -0.494810 | 1.541513  |
| 8             | 2.582417  | -1.034988 | -0.573727 |
| 1             | 2.224965  | -1.428897 | 1.674121  |

## II -2-ts2

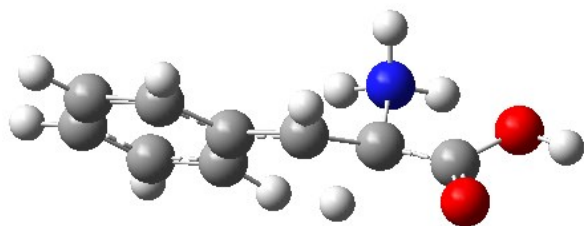

| Atomic Number                               | X         | Y         | Z         |
|---------------------------------------------|-----------|-----------|-----------|
| 7                                           | -1.258030 | -1.306868 | 0.854781  |
| 6                                           | -0.337891 | 0.913805  | 0.098520  |
| 6                                           | -1.417760 | -0.105268 | -0.072118 |
| 6                                           | 1.028041  | 0.466731  | -0.024522 |
| 6                                           | 1.402050  | -0.774901 | -0.599711 |
| 6                                           | 2.084105  | 1.259183  | 0.484950  |
| 6                                           | 2.733158  | -1.178431 | -0.662498 |
| 6                                           | 3.399610  | 0.842829  | 0.424906  |
| 6                                           | 3.746238  | -0.386812 | -0.142720 |
| 1                                           | -0.553606 | 1.838780  | 0.622222  |
| 1                                           | -0.837449 | 0.316776  | -1.058000 |
| 1                                           | 0.652601  | -1.391417 | -1.093519 |
| 1                                           | 1.841596  | 2.217363  | 0.931799  |
| 1                                           | -1.991477 | -2.003480 | 0.711068  |
| 1                                           | -1.268209 | -0.991999 | 1.832411  |
| 1                                           | 2.973754  | -2.126249 | -1.132138 |
| 1                                           | 4.174871  | 1.485964  | 0.827139  |
| 1                                           | 4.778840  | -0.708344 | -0.182420 |
| 6                                           | -2.803398 | 0.273192  | -0.240825 |
| 8                                           | -3.651574 | -0.659911 | 0.318675  |
| 8                                           | -3.235670 | 1.248555  | -0.797305 |
| 1                                           | -4.544333 | -0.355000 | 0.115914  |
| 1                                           | -0.327345 | -1.705448 | 0.675205  |
| Vibrational frequencies (cm <sup>-1</sup> ) |           |           |           |
| -1575.40                                    | 63.17     | 81.82     |           |
| 84.58                                       | 152.72    | 207.42    |           |
| 224.43                                      | 234.13    | 309.22    |           |
| 346.93                                      | 388.03    | 423.34    |           |
| 489.00                                      | 528.77    | 543.90    |           |
| 570.61                                      | 576.38    | 631.94    |           |
| 656.82                                      | 719.54    | 741.77    |           |
| 764.80                                      | 780.27    | 845.17    |           |
| 855.05                                      | 887.73    | 941.40    |           |
| 982.85                                      | 997.56    | 1002.10   |           |
| 1010.99                                     | 1053.49   | 1070.40   |           |

|         |         |         |
|---------|---------|---------|
| 1104.85 | 1117.38 | 1173.79 |
| 1205.56 | 1217.48 | 1261.62 |
| 1317.01 | 1344.41 | 1364.76 |
| 1385.68 | 1404.40 | 1455.49 |
| 1490.89 | 1530.41 | 1613.88 |
| 1621.34 | 1650.68 | 1673.27 |
| 1861.58 | 2351.27 | 3143.33 |
| 3179.09 | 3188.33 | 3196.72 |
| 3205.52 | 3229.59 | 3349.36 |
| 3407.51 | 3519.47 | 3856.88 |

## II -2-i2

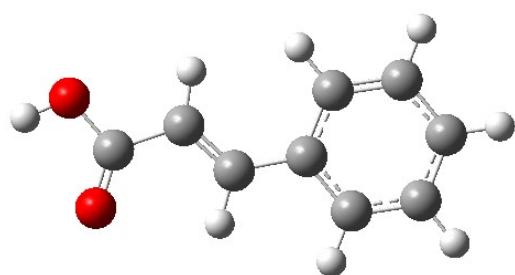

| Atomic Number | Z         | Y         | Z         |
|---------------|-----------|-----------|-----------|
| 6             | -0.572637 | -0.460089 | -0.000095 |
| 6             | -1.568500 | 0.429438  | 0.000031  |
| 6             | 0.866103  | -0.181011 | -0.000062 |
| 6             | 1.387398  | 1.119136  | -0.000168 |
| 6             | 1.756154  | -1.259293 | 0.000091  |
| 6             | 2.757063  | 1.328274  | -0.000104 |
| 6             | 3.129601  | -1.050589 | 0.000160  |
| 6             | 3.633142  | 0.244277  | 0.000066  |
| 1             | -0.859957 | -1.509345 | -0.000209 |
| 1             | -1.421710 | 1.501807  | 0.000184  |
| 1             | 0.717974  | 1.970924  | -0.000319 |
| 1             | 1.360668  | -2.269162 | 0.000163  |
| 1             | 3.146946  | 2.338979  | -0.000190 |
| 1             | 3.804732  | -1.897608 | 0.000287  |
| 1             | 4.703381  | 0.411972  | 0.000117  |
| 6             | -2.965332 | -0.052876 | -0.000006 |
| 8             | -3.839854 | 0.972909  | 0.000268  |
| 8             | -3.318441 | -1.202168 | -0.000236 |
| 1             | -4.723636 | 0.582906  | 0.000230  |

## III-1-ts1

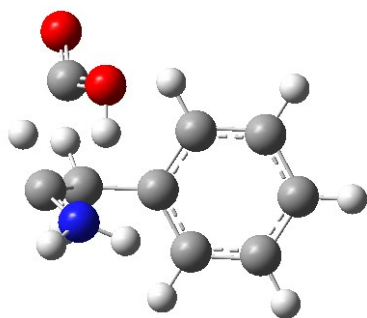

| Atomic Number                               | X         | Z         | Y         |
|---------------------------------------------|-----------|-----------|-----------|
| 7                                           | -1.056406 | 1.723924  | -1.034745 |
| 6                                           | -0.484415 | 1.043491  | 1.242706  |
| 6                                           | -1.522712 | 1.480257  | 0.223007  |
| 6                                           | 0.745956  | 0.357747  | 0.685923  |
| 6                                           | 1.854846  | 1.108278  | 0.289233  |
| 6                                           | 0.775393  | -1.027159 | 0.503853  |
| 6                                           | 2.965755  | 0.495125  | -0.284573 |
| 6                                           | 1.885401  | -1.641487 | -0.062592 |
| 6                                           | 2.981812  | -0.882644 | -0.462518 |
| 1                                           | -0.977645 | 0.415024  | 1.985918  |
| 1                                           | -0.179588 | 1.962476  | 1.757263  |
| 1                                           | 1.852681  | 2.183013  | 0.447990  |
| 1                                           | -0.073777 | -1.626488 | 0.815718  |
| 1                                           | -0.071411 | 1.595048  | -1.251466 |
| 1                                           | -1.542969 | 2.404773  | -1.598602 |
| 1                                           | 3.819066  | 1.092945  | -0.582446 |
| 1                                           | 1.895519  | -2.717489 | -0.189085 |
| 1                                           | 3.845842  | -1.364679 | -0.903675 |
| 6                                           | -2.354839 | -0.626712 | -0.046866 |
| 8                                           | -2.086607 | -0.893344 | -1.317694 |
| 8                                           | -2.664148 | -1.422165 | 0.779564  |
| 1                                           | -1.739885 | -0.068757 | -1.704906 |
| 1                                           | -2.510128 | 0.739351  | 0.242502  |
| Vibrational frequencies (cm <sup>-1</sup> ) |           |           |           |
| -1187.22                                    | 46.62     |           | 72.93     |
| 98.31                                       | 113.83    |           | 135.66    |
| 190.55                                      | 273.16    |           | 320.86    |
| 383.23                                      | 417.20    |           | 450.58    |
| 487.74                                      | 505.16    |           | 547.75    |
| 594.05                                      | 608.89    |           | 633.36    |
| 659.29                                      | 724.75    |           | 732.36    |
| 772.06                                      | 774.10    |           | 847.43    |
| 885.96                                      | 927.30    |           | 946.67    |

|         |         |         |
|---------|---------|---------|
| 962.62  | 1011.11 | 1018.65 |
| 1032.82 | 1064.00 | 1113.09 |
| 1124.85 | 1178.29 | 1186.48 |
| 1209.46 | 1217.90 | 1232.24 |
| 1313.89 | 1335.53 | 1349.10 |
| 1362.66 | 1375.52 | 1413.97 |
| 1464.66 | 1495.48 | 1539.57 |
| 1648.86 | 1658.08 | 1678.08 |
| 1912.16 | 2096.24 | 3052.02 |
| 3132.46 | 3179.29 | 3199.09 |
| 3206.74 | 3216.66 | 3226.83 |
| 3506.00 | 3643.82 | 3658.35 |

### III-1-i1

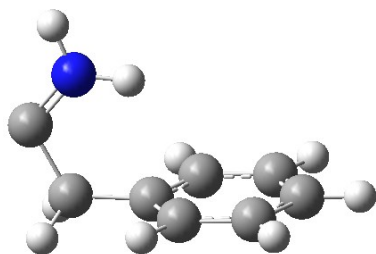

| Atomic Number | X         | Y         | Z         |
|---------------|-----------|-----------|-----------|
| 7             | 2.211773  | -0.000164 | 1.254201  |
| 6             | 1.620382  | 0.000420  | -1.027982 |
| 6             | 2.706001  | -0.000357 | 0.044290  |
| 6             | 0.177325  | 0.000202  | -0.590376 |
| 6             | -0.491553 | 1.199261  | -0.332461 |
| 6             | -0.491271 | -1.199052 | -0.332837 |
| 6             | -1.797268 | 1.201786  | 0.146480  |
| 6             | -1.796989 | -1.202019 | 0.146127  |
| 6             | -2.454916 | -0.000231 | 0.385507  |
| 1             | 1.835513  | -0.867204 | -1.660438 |
| 1             | 1.835866  | 0.868812  | -1.659271 |
| 1             | 0.018395  | 2.139473  | -0.517552 |
| 1             | 0.018760  | -2.139118 | -0.518408 |
| 1             | 1.214073  | 0.000478  | 1.485376  |
| 1             | 2.842417  | -0.000574 | 2.043541  |
| 1             | -2.302469 | 2.142751  | 0.330245  |
| 1             | -2.302045 | -2.143139 | 0.329479  |
| 1             | -3.473193 | -0.000391 | 0.755131  |

### III-1-ts2

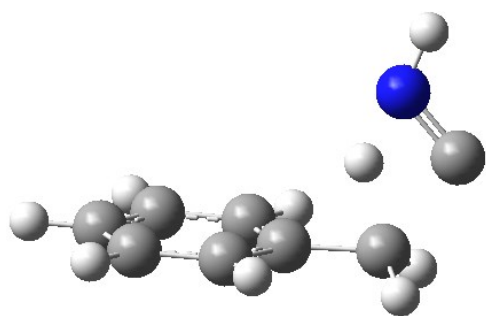

| Atomic | Number    | X         | Y         |
|--------|-----------|-----------|-----------|
| 7      | 2.526911  | -0.000300 | 1.214321  |
| 6      | 1.504058  | 0.000313  | -1.048348 |
| 6      | 3.027944  | 0.000006  | 0.025868  |
| 6      | 0.067157  | 0.000141  | -0.570031 |
| 6      | -0.590952 | 1.203348  | -0.296926 |
| 6      | -0.590847 | -1.203226 | -0.297307 |
| 6      | -1.890682 | 1.202894  | 0.191938  |
| 6      | -1.890577 | -1.203028 | 0.191556  |
| 6      | -2.545525 | -0.000135 | 0.434709  |
| 1      | 1.733703  | -0.896882 | -1.616063 |
| 1      | 1.733639  | 0.897869  | -1.615521 |
| 1      | -0.080291 | 2.142151  | -0.483360 |
| 1      | -0.080085 | -2.141925 | -0.483981 |
| 1      | 1.624281  | -0.000018 | 0.333452  |
| 1      | 3.183113  | -0.000480 | 1.993657  |
| 1      | -2.393350 | 2.143211  | 0.384162  |
| 1      | -2.393150 | -2.143449 | 0.383530  |
| 1      | -3.559697 | -0.000251 | 0.815125  |

Vibrational frequencies (cm<sup>-1</sup>)

|          |         |         |
|----------|---------|---------|
| -1865.50 | 35.00   | 93.39   |
| 141.39   | 252.77  | 345.43  |
| 393.51   | 408.84  | 456.40  |
| 511.06   | 549.36  | 632.17  |
| 660.23   | 702.25  | 715.55  |
| 786.24   | 817.00  | 866.25  |
| 939.78   | 997.05  | 1013.49 |
| 1017.60  | 1021.00 | 1061.29 |
| 1111.33  | 1128.14 | 1160.65 |
| 1181.01  | 1197.50 | 1208.00 |
| 1218.54  | 1331.03 | 1355.41 |
| 1443.39  | 1495.75 | 1518.43 |
| 1538.10  | 1655.36 | 1674.64 |
| 1902.54  | 3134.92 | 3196.47 |
| 3197.87  | 3209.77 | 3210.89 |



3219.18

3229.53

3492.12

**III-2-ts2**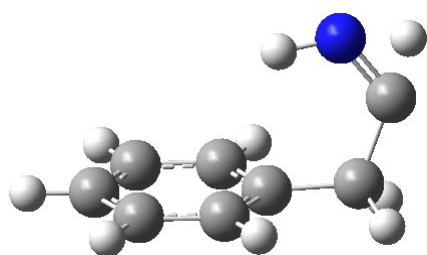

| Atomic Number                               | X         | Y         | Z         |
|---------------------------------------------|-----------|-----------|-----------|
| 7                                           | 2.215591  | 0.164789  | 1.344746  |
| 6                                           | 1.609878  | -0.122246 | -1.039191 |
| 6                                           | 2.610986  | 0.069215  | 0.091394  |
| 6                                           | 0.173514  | -0.068092 | -0.599058 |
| 6                                           | -0.459412 | 1.162073  | -0.409841 |
| 6                                           | -0.519246 | -1.232632 | -0.263084 |
| 6                                           | -1.761026 | 1.226483  | 0.074649  |
| 6                                           | -1.821772 | -1.173017 | 0.220665  |
| 6                                           | -2.446877 | 0.057862  | 0.388237  |
| 1                                           | 1.852663  | -1.078908 | -1.511679 |
| 1                                           | 1.830550  | 0.644672  | -1.787404 |
| 1                                           | 0.074682  | 2.075546  | -0.650863 |
| 1                                           | -0.033857 | -2.194923 | -0.391540 |
| 1                                           | 1.216064  | 0.005117  | 1.579438  |
| 1                                           | 3.285171  | -0.330770 | 1.130043  |
| 1                                           | -2.239991 | 2.189251  | 0.207476  |
| 1                                           | -2.348619 | -2.087628 | 0.465630  |
| 1                                           | -3.462068 | 0.106235  | 0.763055  |
| Vibrational frequencies (cm <sup>-1</sup> ) |           |           |           |
| -1931.80                                    | 30.50     |           | 100.90    |
| 147.87                                      | 270.06    |           | 335.88    |
| 381.48                                      | 413.29    |           | 485.80    |
| 503.86                                      | 632.79    |           | 669.84    |
| 722.24                                      | 751.19    |           | 775.77    |
| 848.26                                      | 875.73    |           | 905.92    |
| 949.34                                      | 990.46    |           | 1002.66   |
| 1019.76                                     | 1024.38   |           | 1063.46   |
| 1110.70                                     | 1174.94   |           | 1187.15   |
| 1206.22                                     | 1230.94   |           | 1275.04   |
| 1331.11                                     | 1331.72   |           | 1356.93   |
| 1448.15                                     | 1494.97   |           | 1539.16   |
| 1553.81                                     | 1658.58   |           | 1681.02   |

|         |         |         |
|---------|---------|---------|
| 2537.97 | 3073.52 | 3111.89 |
| 3190.03 | 3192.03 | 3207.33 |
| 3210.62 | 3216.37 | 3228.19 |

### III-2-i2

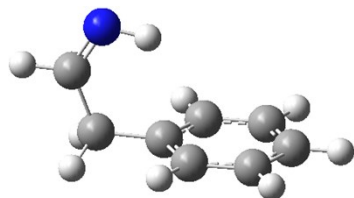

| Atomic Number | X         | Y         | Z         |
|---------------|-----------|-----------|-----------|
| 7             | -2.347034 | 0.000231  | 1.390799  |
| 6             | -1.595527 | -0.000190 | -0.999854 |
| 6             | -2.587124 | 0.000008  | 0.152084  |
| 6             | -0.157971 | -0.000088 | -0.556632 |
| 6             | 0.510524  | -1.200405 | -0.315485 |
| 6             | 0.510468  | 1.200315  | -0.315737 |
| 6             | 1.823159  | -1.202481 | 0.142651  |
| 6             | 1.823104  | 1.202549  | 0.142398  |
| 6             | 2.483113  | 0.000073  | 0.371086  |
| 1             | -1.808004 | 0.874463  | -1.623470 |
| 1             | -1.807960 | -0.875104 | -1.623123 |
| 1             | -0.003976 | -2.139828 | -0.489713 |
| 1             | -0.004087 | 2.139676  | -0.490138 |
| 1             | -1.335592 | 0.000268  | 1.556357  |
| 1             | -3.637394 | -0.000054 | -0.155033 |
| 1             | 2.330726  | -2.143053 | 0.320272  |
| 1             | 2.330614  | 2.143186  | 0.319843  |
| 1             | 3.506441  | 0.000136  | 0.726354  |

### III-2-ts3

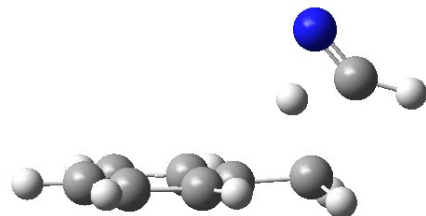

| Atomic Number | X        | Y         | Z         |
|---------------|----------|-----------|-----------|
| 7             | 2.573815 | 0.000007  | 1.433641  |
| 6             | 1.453491 | -0.000005 | -1.109504 |
| 6             | 2.934270 | -0.000000 | 0.280439  |
| 6             | 0.051075 | -0.000002 | -0.623984 |

|   |           |           |           |
|---|-----------|-----------|-----------|
| 6 | -0.604037 | 1.203241  | -0.327800 |
| 6 | -0.604039 | -1.203244 | -0.327793 |
| 6 | -1.886023 | 1.202250  | 0.203869  |
| 6 | -1.886024 | -1.202249 | 0.203876  |
| 6 | -2.534072 | 0.000002  | 0.468657  |
| 1 | 1.732555  | -0.906550 | -1.641680 |
| 1 | 1.732556  | 0.906535  | -1.641688 |
| 1 | -0.101734 | 2.143454  | -0.529993 |
| 1 | -0.101737 | -2.143458 | -0.529981 |
| 1 | 1.677274  | 0.000002  | 0.385226  |
| 1 | 3.791894  | -0.000006 | -0.396674 |
| 1 | -2.380518 | 2.143043  | 0.414378  |
| 1 | -2.380520 | -2.143040 | 0.414390  |
| 1 | -3.534322 | 0.000004  | 0.883964  |

Vibrational frequencies (cm<sup>-1</sup>)

|          |         |         |
|----------|---------|---------|
| -2146.53 | 33.97   | 76.56   |
| 123.79   | 227.99  | 359.55  |
| 409.59   | 424.54  | 471.36  |
| 483.48   | 536.81  | 625.85  |
| 632.62   | 714.19  | 729.76  |
| 782.56   | 827.00  | 861.86  |
| 931.32   | 943.30  | 995.42  |
| 1013.61  | 1019.09 | 1060.74 |
| 1062.87  | 1066.56 | 1127.64 |
| 1163.85  | 1179.65 | 1203.95 |
| 1252.07  | 1329.40 | 1355.10 |
| 1460.24  | 1495.27 | 1532.73 |
| 1650.84  | 1671.62 | 1822.50 |
| 2144.22  | 3093.64 | 3114.44 |
| 3194.31  | 3194.92 | 3199.89 |
| 3208.83  | 3218.01 | 3229.00 |

**IV-ts**

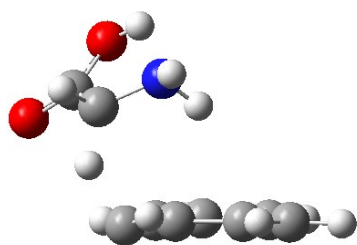

| Atomic Number | X         | Y        | Z         |
|---------------|-----------|----------|-----------|
| 7             | -1.385914 | 1.461410 | -1.124377 |
| 6             | -0.048194 | 1.276692 | 1.637601  |

|   |           |           |           |
|---|-----------|-----------|-----------|
| 6 | -1.927983 | 0.905037  | 0.080474  |
| 6 | 0.916316  | 0.549884  | 0.819355  |
| 6 | 1.870367  | 1.199992  | 0.010870  |
| 6 | 0.944544  | -0.858556 | 0.884438  |
| 6 | 2.832943  | 0.476180  | -0.681648 |
| 6 | 1.869797  | -1.581332 | 0.150112  |
| 6 | 2.821525  | -0.914282 | -0.622269 |
| 1 | -1.336398 | 0.956585  | 1.124755  |
| 1 | -0.035188 | 2.335892  | 1.319075  |
| 1 | 1.859640  | 2.284400  | -0.045346 |
| 1 | 0.216022  | -1.354958 | 1.515687  |
| 1 | -0.385917 | 1.282613  | -1.202230 |
| 1 | -1.545687 | 2.457222  | -1.199877 |
| 1 | 3.578541  | 0.988616  | -1.277682 |
| 1 | 1.869077  | -2.663585 | 0.191637  |
| 1 | 3.559233  | -1.482431 | -1.176799 |
| 6 | -2.163791 | -0.600059 | -0.046859 |
| 8 | -2.134666 | -1.051850 | -1.302823 |
| 8 | -2.354610 | -1.306375 | 0.897112  |
| 1 | -1.989903 | -0.280754 | -1.877633 |
| 1 | -2.866956 | 1.390986  | 0.352301  |

Vibrational frequencies (cm<sup>-1</sup>)

|         |         |         |
|---------|---------|---------|
| -404.05 | 31.11   | 41.11   |
| 76.00   | 94.35   | 135.53  |
| 215.78  | 328.49  | 355.96  |
| 356.78  | 395.74  | 420.64  |
| 497.25  | 530.21  | 545.04  |
| 592.52  | 627.74  | 681.42  |
| 713.28  | 769.25  | 784.61  |
| 824.93  | 843.24  | 854.85  |
| 878.80  | 932.05  | 956.92  |
| 967.50  | 1013.16 | 1014.81 |
| 1033.98 | 1057.24 | 1076.02 |
| 1109.22 | 1134.49 | 1181.78 |
| 1195.99 | 1199.14 | 1235.81 |
| 1258.70 | 1314.71 | 1337.62 |
| 1348.79 | 1372.87 | 1421.51 |
| 1464.81 | 1492.45 | 1521.19 |
| 1634.04 | 1658.14 | 1662.60 |
| 1711.33 | 1912.07 | 2989.71 |
| 3125.73 | 3187.49 | 3204.06 |
| 3214.61 | 3221.14 | 3229.78 |
| 3498.71 | 3634.69 | 3691.61 |

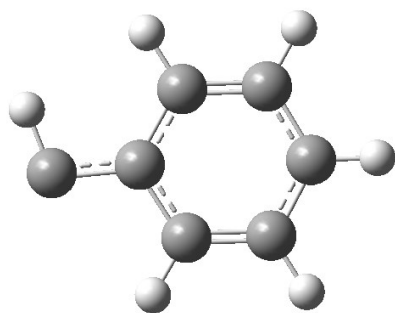

| Atomic Number | X         | Y         | Z         |
|---------------|-----------|-----------|-----------|
| 6             | -2.476047 | -0.173323 | -0.000009 |
| 6             | -1.038700 | -0.039669 | -0.000001 |
| 6             | -0.348214 | 1.194402  | 0.000001  |
| 6             | -0.277860 | -1.228216 | -0.000005 |
| 6             | 1.034932  | 1.236821  | -0.000007 |
| 6             | 1.107295  | -1.191423 | 0.000005  |
| 6             | 1.756520  | 0.041639  | 0.000001  |
| 1             | -2.882674 | 0.857882  | 0.000066  |
| 1             | -0.925034 | 2.113303  | 0.000009  |
| 1             | -0.823747 | -2.164305 | -0.000003 |
| 1             | 1.558893  | 2.184763  | -0.000007 |
| 1             | 1.684600  | -2.107655 | 0.000015  |
| 1             | 2.840400  | 0.074628  | 0.000010  |

### Glycine

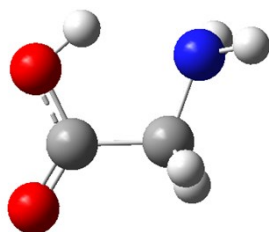

| Atomic Number | X         | Y         | Z         |
|---------------|-----------|-----------|-----------|
| 7             | 1.771776  | 0.127260  | -0.083715 |
| 6             | 0.645643  | -0.784223 | 0.118241  |
| 1             | 0.609377  | -1.632870 | -0.568128 |
| 1             | 2.084719  | 0.120351  | -1.047056 |
| 1             | 2.563311  | -0.112152 | 0.498181  |
| 6             | -0.688863 | -0.040710 | 0.005283  |
| 8             | -0.573723 | 1.286147  | 0.058238  |
| 8             | -1.734221 | -0.610595 | -0.094212 |
| 1             | 0.383472  | 1.468301  | 0.117846  |

1            0.679556            -1.189269            1.131804

**IV-1-ts1**

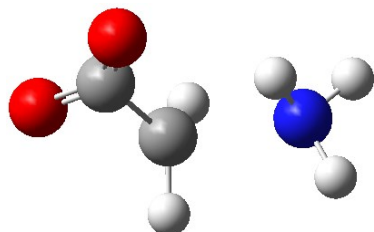

| Atomic Number | X         | Y         | Z         |
|---------------|-----------|-----------|-----------|
| 7             | 2.040531  | 0.010497  | 0.000003  |
| 6             | 0.158352  | -0.924993 | -0.000006 |
| 1             | 0.321067  | -1.455779 | -0.926622 |
| 1             | 2.624617  | -0.088800 | -0.823475 |
| 1             | 2.624481  | -0.088637 | 0.823596  |
| 6             | -0.745179 | 0.223272  | 0.000002  |
| 8             | -0.610204 | 1.420881  | -0.000004 |
| 8             | -1.675348 | -0.635850 | 0.000006  |
| 1             | 1.630423  | 0.945611  | -0.000111 |
| 1             | 0.321074  | -1.455797 | 0.926598  |

Vibrational frequencies (cm<sup>-1</sup>)

|         |         |         |
|---------|---------|---------|
| -549.13 | 137.88  | 181.76  |
| 212.31  | 363.88  | 465.71  |
| 539.09  | 607.91  | 680.73  |
| 941.16  | 1010.98 | 1040.43 |
| 1118.71 | 1174.50 | 1370.43 |
| 1444.11 | 1650.03 | 1682.10 |
| 1950.31 | 3204.09 | 3321.63 |
| 3457.61 | 3593.21 | 3644.24 |

**IV-1-i1**

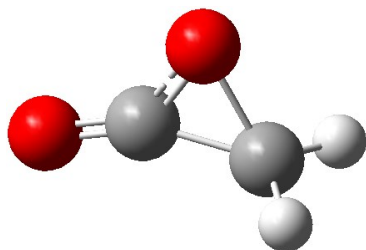

| Atomic Number | X        | Y         | Z        |
|---------------|----------|-----------|----------|
| 6             | 1.031218 | -0.571918 | 0.000001 |

|   |           |           |           |
|---|-----------|-----------|-----------|
| 1 | 1.501733  | -0.885702 | 0.923819  |
| 6 | -0.329066 | -0.072248 | 0.000001  |
| 8 | -1.505116 | -0.157542 | 0.000004  |
| 8 | 0.603070  | 0.862094  | -0.000006 |
| 1 | 1.501729  | -0.885712 | -0.923817 |

#### IV-2-ts1

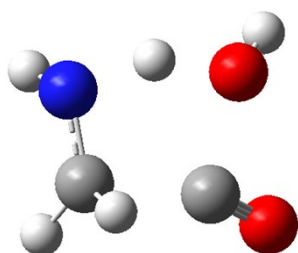

| Atomic Number | X         | Y         | Z         |
|---------------|-----------|-----------|-----------|
| 7             | -1.726986 | 0.180258  | -0.233661 |
| 6             | -1.120978 | -0.890835 | 0.255880  |
| 1             | -0.827427 | 1.051644  | 0.006484  |
| 1             | -1.925542 | 0.079281  | -1.224216 |
| 6             | 0.822173  | -0.423144 | 0.031039  |
| 8             | 0.320976  | 1.359437  | 0.242804  |
| 8             | 1.936657  | -0.560757 | -0.183973 |
| 1             | 0.734743  | 1.902981  | -0.433498 |
| 1             | -1.156433 | -1.860138 | -0.240290 |
| 1             | -1.004674 | -0.941137 | 1.334985  |

#### Vibrational frequencies (cm<sup>-1</sup>)

|          |         |         |
|----------|---------|---------|
| -1285.43 | 88.73   | 151.98  |
| 241.60   | 397.08  | 499.31  |
| 561.80   | 576.07  | 600.56  |
| 745.70   | 794.61  | 999.69  |
| 1107.17  | 1214.72 | 1320.30 |
| 1411.20  | 1493.02 | 1589.20 |
| 1800.95  | 2121.08 | 3118.47 |
| 3200.28  | 3558.85 | 3903.23 |

#### IV-3-ts1

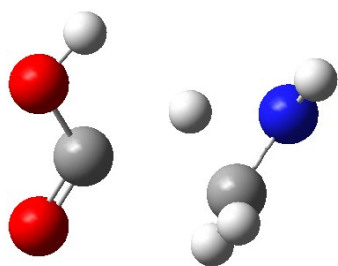

| Atomic Number                               | X         | Y         | Z         |
|---------------------------------------------|-----------|-----------|-----------|
| 7                                           | 2.105264  | 0.359059  | -0.334710 |
| 6                                           | 1.310649  | -0.522947 | 0.323693  |
| 1                                           | 1.087202  | -1.470335 | -0.160179 |
| 1                                           | 0.760253  | 0.375169  | -0.473929 |
| 1                                           | 2.353991  | 1.119586  | 0.294863  |
| 6                                           | -0.772490 | -0.076766 | -0.077707 |
| 8                                           | -1.464342 | 1.085830  | 0.091884  |
| 8                                           | -1.345055 | -1.117422 | -0.130264 |
| 1                                           | -0.853711 | 1.829040  | 0.107169  |
| 1                                           | 1.161638  | -0.515856 | 1.406168  |
| Vibrational frequencies (cm <sup>-1</sup> ) |           |           |           |
| -2280.95                                    | 66.80     |           | 112.34    |
| 240.94                                      | 311.50    |           | 333.13    |
| 514.45                                      | 653.70    |           | 695.50    |
| 932.75                                      | 1060.12   |           | 1114.10   |
| 1118.16                                     | 1223.57   |           | 1268.02   |
| 1321.54                                     | 1383.21   |           | 1548.14   |
| 1869.26                                     | 2084.92   |           | 3083.20   |
| 3201.41                                     | 3522.21   |           | 3877.08   |

#### IV-4-ts1

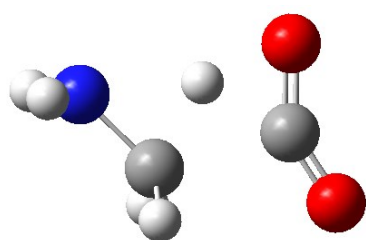

| Atomic Number | X         | Y         | Z         |
|---------------|-----------|-----------|-----------|
| 8             | 0.781290  | 1.312480  | -0.005767 |
| 8             | 1.752455  | -0.781423 | 0.007097  |
| 7             | -2.014953 | 0.171533  | 0.003303  |
| 6             | -0.825397 | -0.688584 | -0.007219 |



|   |           |           |           |
|---|-----------|-----------|-----------|
| 6 | 0.961708  | 0.086821  | 0.000143  |
| 1 | -0.731140 | -1.317518 | 0.874104  |
| 1 | -2.546976 | 0.118029  | 0.859115  |
| 1 | -2.611571 | 0.054793  | -0.802248 |
| 1 | -0.353691 | 0.588580  | -0.009374 |
| 1 | -0.739778 | -1.282485 | -0.912900 |

Vibrational frequencies (cm<sup>-1</sup>)

|          |         |         |
|----------|---------|---------|
| -1761.26 | 55.90   | 176.98  |
| 209.79   | 316.71  | 434.90  |
| 611.16   | 652.81  | 720.27  |
| 814.11   | 955.29  | 1032.64 |
| 1181.43  | 1206.49 | 1329.45 |
| 1385.97  | 1446.64 | 1555.67 |
| 1641.91  | 2154.41 | 3125.02 |
| 3204.68  | 3588.26 | 3696.32 |

### methanamine

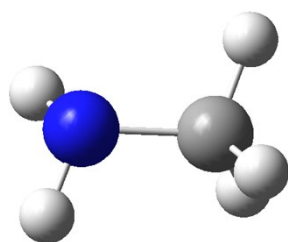

| Atomic Number | X         | Y         | Z         |
|---------------|-----------|-----------|-----------|
| 7             | -0.749951 | 0.000001  | 0.124076  |
| 6             | 0.705375  | 0.000004  | -0.018122 |
| 1             | 1.075359  | 0.000469  | -1.052209 |
| 1             | -1.142901 | -0.811018 | -0.339832 |
| 1             | -1.142948 | 0.811026  | -0.339794 |
| 1             | 1.113895  | -0.877687 | 0.485612  |
| 1             | 1.114003  | 0.877182  | 0.486422  |

### IV-4-ts2

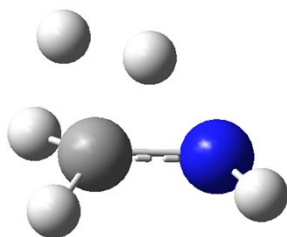

| Atomic Number | X | Y | Z |
|---------------|---|---|---|
|---------------|---|---|---|

|   |           |           |           |
|---|-----------|-----------|-----------|
| 7 | 0.806854  | -0.005741 | -0.143518 |
| 6 | -0.549639 | -0.190074 | 0.010313  |
| 1 | -1.007584 | -0.591020 | 0.919004  |
| 1 | 1.226445  | 0.005380  | 0.784280  |
| 1 | -0.223342 | 1.043730  | -0.007526 |
| 1 | -1.099665 | -0.431341 | -0.896823 |
| 1 | -1.246000 | 1.153878  | 0.143814  |

Vibrational frequencies (cm<sup>-1</sup>)

|          |         |         |
|----------|---------|---------|
| -2368.42 | 714.59  | 775.12  |
| 1026.04  | 1138.98 | 1190.19 |
| 1259.75  | 1384.49 | 1413.63 |
| 1485.57  | 1672.31 | 2213.34 |
| 3063.82  | 3167.83 | 3510.04 |

#### IV-5-ts1

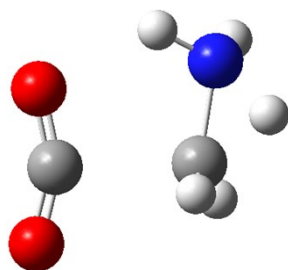

| Atomic Number | X         | Y         | Z         |
|---------------|-----------|-----------|-----------|
| 7             | 1.866013  | 0.261496  | -0.008722 |
| 6             | 0.877983  | -0.911180 | 0.044231  |
| 1             | 0.747046  | -1.486916 | -0.855204 |
| 1             | 2.151471  | 0.416995  | -0.965986 |
| 1             | 2.167312  | -0.844024 | 0.357023  |
| 6             | -1.001333 | 0.156755  | -0.004210 |
| 8             | -0.600188 | 1.271567  | 0.035286  |
| 8             | -1.834131 | -0.670374 | -0.050362 |
| 1             | 1.398748  | 1.090741  | 0.369159  |
| 1             | 0.687978  | -1.290267 | 1.036551  |

Vibrational frequencies (cm<sup>-1</sup>)

|          |         |         |
|----------|---------|---------|
| -1700.39 | 103.41  | 178.82  |
| 235.64   | 271.87  | 379.76  |
| 492.39   | 599.53  | 669.65  |
| 734.20   | 894.67  | 936.12  |
| 1026.50  | 1267.90 | 1340.13 |
| 1357.75  | 1442.32 | 1615.34 |
| 2237.72  | 2306.09 | 3201.35 |
| 3354.28  | 3401.79 | 3646.46 |

#### IV-6-ts1

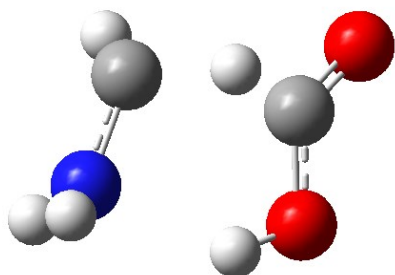

| Atomic Number                               | X         | Y         | Z         |
|---------------------------------------------|-----------|-----------|-----------|
| 7                                           | -1.908649 | 0.167067  | 0.055484  |
| 6                                           | -1.164019 | -0.968169 | -0.138301 |
| 1                                           | -0.851411 | -1.419575 | 0.808472  |
| 1                                           | -2.220067 | 0.438370  | 0.979567  |
| 1                                           | -2.543460 | 0.428747  | -0.685137 |
| 6                                           | 0.912533  | -0.063713 | -0.100711 |
| 8                                           | 0.659715  | 1.229304  | 0.011399  |
| 8                                           | 1.946497  | -0.606971 | 0.084319  |
| 1                                           | -0.304734 | 1.334725  | -0.099180 |
| 1                                           | -0.060562 | -0.739106 | -0.723779 |
| Vibrational frequencies (cm <sup>-1</sup> ) |           |           |           |
| -1048.01                                    | 125.13    | 217.49    |           |
| 275.81                                      | 453.81    | 559.78    |           |
| 614.79                                      | 650.69    | 750.86    |           |
| 776.68                                      | 986.59    | 1070.61   |           |
| 1119.19                                     | 1270.69   | 1347.08   |           |
| 1388.13                                     | 1442.49   | 1671.79   |           |
| 1930.54                                     | 1981.86   | 3107.97   |           |
| 3552.73                                     | 3605.05   | 3657.27   |           |

#### IV-7-ts1

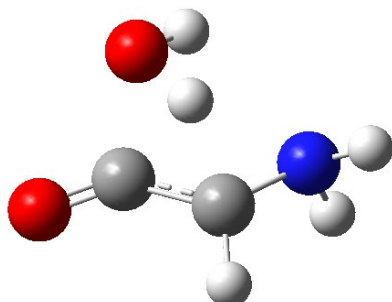

| Atomic Number | X | Y | Z |
|---------------|---|---|---|
|---------------|---|---|---|

|   |           |           |           |
|---|-----------|-----------|-----------|
| 7 | 1.741028  | -0.068001 | -0.312485 |
| 6 | 0.636787  | -0.609567 | 0.468272  |
| 1 | 2.047098  | -0.718403 | -1.028178 |
| 1 | 2.537631  | 0.124045  | 0.281588  |
| 6 | -0.653135 | -0.273667 | -0.040040 |
| 8 | -0.483209 | 1.371365  | 0.111657  |
| 8 | -1.736335 | -0.667810 | -0.214417 |
| 1 | 0.161038  | 1.627207  | -0.564754 |
| 1 | 0.211979  | 0.738606  | 0.896382  |
| 1 | 0.709491  | -1.624494 | 0.855044  |

Vibrational frequencies (cm<sup>-1</sup>)

|          |         |         |
|----------|---------|---------|
| -1763.85 | 179.97  | 290.35  |
| 387.15   | 435.10  | 556.73  |
| 581.10   | 638.76  | 737.47  |
| 879.40   | 888.34  | 1001.52 |
| 1064.13  | 1176.23 | 1218.62 |
| 1363.67  | 1484.91 | 1680.69 |
| 1869.01  | 2049.47 | 3142.26 |
| 3533.82  | 3615.16 | 3811.53 |

#### IV-7-ts2

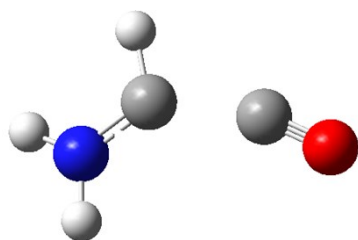

| Atomic Number | X         | Y         | Z         |
|---------------|-----------|-----------|-----------|
| 7             | -1.718736 | -0.318620 | -0.036373 |
| 6             | -0.749957 | 0.506093  | 0.335922  |
| 1             | -1.735759 | -1.262240 | 0.322478  |
| 1             | -2.432238 | -0.107561 | -0.724253 |
| 6             | 1.005273  | 0.149680  | -0.381390 |
| 8             | 1.947604  | -0.227923 | 0.132001  |
| 1             | -0.913586 | 1.488891  | -0.126819 |

Vibrational frequencies (cm<sup>-1</sup>)

|         |         |         |
|---------|---------|---------|
| -364.61 | 87.71   | 306.11  |
| 393.29  | 604.21  | 671.21  |
| 1011.51 | 1150.76 | 1379.86 |
| 1388.28 | 1685.67 | 2139.74 |
| 3057.37 | 3529.90 | 3652.98 |

#### IV-9-ts1

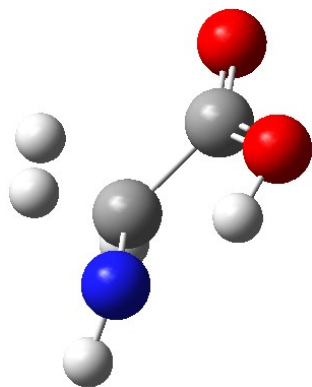

| Atomic Number                               | X         | Y         | Z         |
|---------------------------------------------|-----------|-----------|-----------|
| 7                                           | 1.745081  | 0.207520  | 0.073424  |
| 6                                           | 0.704241  | -0.692495 | -0.158027 |
| 1                                           | 0.734526  | -1.457643 | -0.938744 |
| 1                                           | 2.581523  | -0.071412 | -0.427399 |
| 1                                           | 1.236773  | -0.999094 | 0.935650  |
| 6                                           | -0.684349 | -0.001169 | -0.028509 |
| 8                                           | -0.524828 | 1.296244  | 0.013628  |
| 8                                           | -1.706774 | -0.617730 | 0.006106  |
| 1                                           | 0.474826  | 1.407581  | 0.021404  |
| 1                                           | 0.490245  | -1.598204 | 0.856464  |
| Vibrational frequencies (cm <sup>-1</sup> ) |           |           |           |
| -2140.27                                    | 128.79    |           | 292.18    |
| 441.21                                      | 514.64    |           | 604.38    |
| 696.37                                      | 843.17    |           | 878.42    |
| 941.55                                      | 967.50    |           | 1036.23   |
| 1125.16                                     | 1209.19   |           | 1259.91   |
| 1362.76                                     | 1451.35   |           | 1526.29   |
| 1927.36                                     | 1998.23   |           | 2356.64   |
| 3087.16                                     | 3105.61   |           | 3576.41   |

#### IV-9-i1

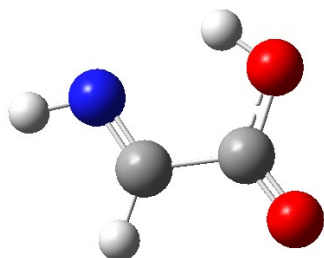

| Atomic Number | X         | Y        | Z        |
|---------------|-----------|----------|----------|
| 7             | -1.779711 | 0.127004 | 0.000014 |

|   |           |           |           |
|---|-----------|-----------|-----------|
| 6 | -0.797784 | -0.664667 | -0.000018 |
| 1 | -0.835362 | -1.755450 | -0.000035 |
| 1 | -2.677127 | -0.356636 | 0.000021  |
| 6 | 0.595343  | -0.068289 | -0.000006 |
| 8 | 0.614228  | 1.261565  | -0.000008 |
| 8 | 1.572593  | -0.754465 | 0.000014  |
| 1 | -0.309458 | 1.563994  | 0.000016  |

#### IV-9-ts2

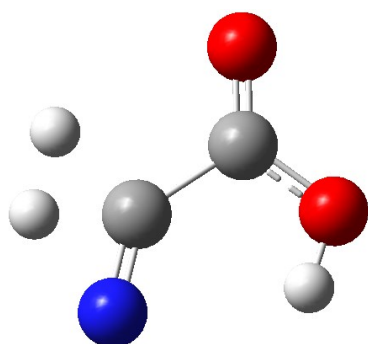

| Atomic Number                               | X         | Y         | Z         |
|---------------------------------------------|-----------|-----------|-----------|
| 7                                           | 1.942944  | 0.197864  | 0.000011  |
| 6                                           | 0.878557  | -0.405958 | -0.000058 |
| 1                                           | 0.826143  | -1.779771 | -0.000100 |
| 1                                           | 1.725523  | -1.281086 | 0.000236  |
| 6                                           | -0.605326 | -0.068954 | -0.000010 |
| 8                                           | -0.772814 | 1.245872  | 0.000003  |
| 8                                           | -1.464182 | -0.888558 | 0.000017  |
| 1                                           | 0.104311  | 1.666766  | 0.000035  |
| Vibrational frequencies (cm <sup>-1</sup> ) |           |           |           |
| -2234.32                                    | 125.78    |           | 247.20    |
| 253.79                                      | 512.63    |           | 566.08    |
| 645.66                                      | 703.71    |           | 822.30    |
| 871.83                                      | 1080.03   |           | 1234.28   |
| 1402.24                                     | 1812.72   |           | 1902.90   |
| 1957.43                                     | 2491.55   |           | 3719.53   |

#### IV-9-i2

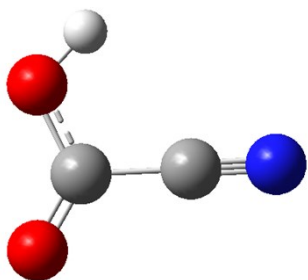

| Atomic Number | X         | Y         | Z         |
|---------------|-----------|-----------|-----------|
| 7             | -0.438746 | -0.697717 | -0.008222 |
| 6             | -1.578784 | -0.567957 | -0.007486 |
| 6             | -3.051673 | -0.389466 | -0.003992 |
| 8             | -3.435334 | 0.887642  | 0.005486  |
| 8             | -3.799676 | -1.306350 | -0.009016 |
| 1             | -2.677041 | 1.483353  | 0.008104  |

#### IV-9-ts3

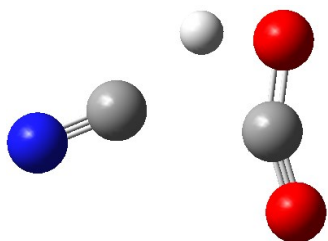

| Atomic Number | X         | Y         | Z         |
|---------------|-----------|-----------|-----------|
| 7             | -2.287733 | -0.237834 | 0.000000  |
| 6             | -1.216288 | 0.196911  | -0.000000 |
| 6             | 0.891038  | -0.084941 | -0.000000 |
| 8             | 1.043327  | 1.143454  | 0.000000  |
| 8             | 1.210599  | -1.175001 | -0.000000 |
| 1             | -0.065782 | 1.245395  | -0.000002 |

Vibrational frequencies (cm<sup>-1</sup>)

|          |         |         |
|----------|---------|---------|
| -1549.41 | 121.15  | 167.61  |
| 357.82   | 462.83  | 606.79  |
| 845.05   | 954.51  | 1302.68 |
| 2027.44  | 2303.35 | 2395.62 |

#### IV-10-ts2

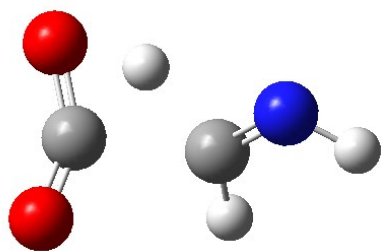

| Atomic Number | X         | Y         | Z         |
|---------------|-----------|-----------|-----------|
| 7             | 1.866996  | 0.102311  | 0.420126  |
| 6             | 1.014439  | -0.186456 | -0.472907 |
| 1             | 1.170004  | -0.892489 | -1.296657 |
| 1             | 2.756514  | -0.385268 | 0.270270  |
| 6             | -0.818818 | -0.031344 | 0.010910  |
| 8             | -0.999274 | 1.201819  | -0.000528 |
| 8             | -1.291790 | -1.084664 | 0.166083  |
| 1             | 0.159297  | 0.931130  | -0.466952 |

| Vibrational frequencies (cm <sup>-1</sup> ) |         |         |  |
|---------------------------------------------|---------|---------|--|
| -2061.19                                    | 124.77  | 209.90  |  |
| 281.83                                      | 599.76  | 649.65  |  |
| 685.53                                      | 754.92  | 1005.15 |  |
| 1149.88                                     | 1183.97 | 1317.00 |  |
| 1408.47                                     | 1649.54 | 1863.25 |  |
| 2177.13                                     | 3061.92 | 3434.12 |  |

#### IV-11-ts2

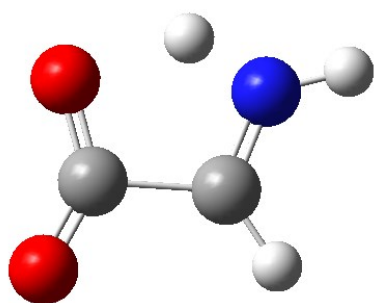

| Atomic Number | X         | Y         | Z         |
|---------------|-----------|-----------|-----------|
| 7             | 1.670628  | 0.008581  | -0.000006 |
| 6             | 0.683584  | -0.787864 | 0.000007  |
| 1             | 0.772775  | -1.870096 | 0.000019  |
| 1             | 2.650022  | -0.249259 | -0.000007 |
| 6             | -0.664209 | 0.054809  | 0.000002  |
| 8             | -0.359033 | 1.268131  | -0.000013 |
| 8             | -1.691799 | -0.585677 | 0.000013  |
| 1             | 1.173215  | 0.997977  | -0.000016 |

| Vibrational frequencies (cm <sup>-1</sup> ) |  |  |  |
|---------------------------------------------|--|--|--|
|                                             |  |  |  |



|         |         |         |
|---------|---------|---------|
| -510.55 | 183.95  | 446.55  |
| 599.98  | 712.43  | 812.44  |
| 830.39  | 902.37  | 1012.13 |
| 1103.09 | 1209.45 | 1346.91 |
| 1368.81 | 1728.34 | 1916.40 |
| 2530.98 | 3215.83 | 3619.35 |

#### IV-11-i2

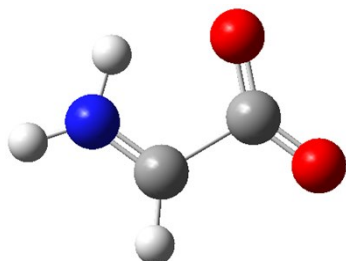

| Atomic Number | X         | Y         | Z         |
|---------------|-----------|-----------|-----------|
| 7             | -1.717469 | 0.008538  | 0.000006  |
| 6             | -0.688857 | -0.742805 | -0.000006 |
| 1             | -0.784851 | -1.825596 | -0.000019 |
| 1             | -2.681828 | -0.300572 | 0.000006  |
| 6             | 0.688408  | 0.072093  | -0.000002 |
| 8             | 0.447330  | 1.283774  | 0.000013  |
| 8             | 1.667878  | -0.648630 | -0.000013 |
| 1             | -1.430014 | 1.009524  | 0.000017  |

#### IV-11-ts3

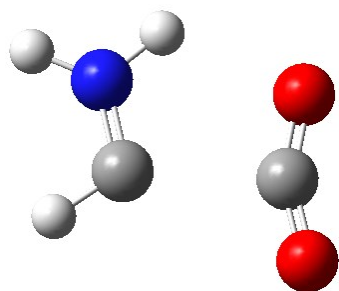

| Atomic Number | X         | Y         | Z         |
|---------------|-----------|-----------|-----------|
| 7             | -1.854818 | 0.146364  | 0.000005  |
| 6             | -1.001742 | -0.820604 | -0.000008 |
| 1             | -1.500824 | -1.798908 | -0.000019 |
| 1             | -2.867007 | 0.054810  | 0.000006  |
| 6             | 0.979009  | 0.113278  | -0.000001 |
| 8             | 0.604914  | 1.236012  | 0.000014  |
| 8             | 1.764653  | -0.752094 | -0.000012 |

|                                             |           |          |          |
|---------------------------------------------|-----------|----------|----------|
| 1                                           | -1.468577 | 1.092166 | 0.000016 |
| Vibrational frequencies (cm <sup>-1</sup> ) |           |          |          |
| -206.10                                     | 106.13    | 248.30   |          |
| 386.34                                      | 392.08    | 623.99   |          |
| 715.35                                      | 883.66    | 1045.98  |          |
| 1156.34                                     | 1337.16   | 1379.58  |          |
| 1521.92                                     | 1685.19   | 2274.66  |          |
| 3061.85                                     | 3445.37   | 3564.27  |          |

### V-1-ts1

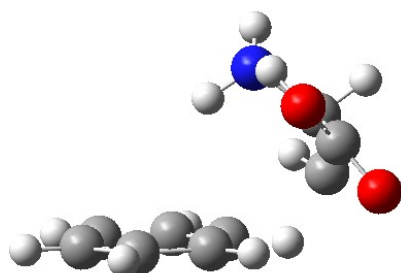

| Atomic Number | X         | Y         | Z         |
|---------------|-----------|-----------|-----------|
| 7             | -1.096235 | 0.878131  | -1.612547 |
| 6             | -1.032077 | 1.696591  | 0.853882  |
| 6             | -1.684172 | 0.947743  | -0.260170 |
| 6             | 0.879870  | 0.435103  | 0.867029  |
| 6             | 1.955881  | 1.187348  | 0.410339  |
| 6             | 0.829649  | -0.942324 | 0.674287  |
| 6             | 3.000673  | 0.551425  | -0.253666 |
| 6             | 1.879738  | -1.570667 | 0.011404  |
| 6             | 2.957716  | -0.824970 | -0.456862 |
| 1             | 0.056358  | 0.905596  | 1.525274  |
| 1             | -0.424983 | 2.488787  | 0.385833  |
| 1             | 1.983592  | 2.257979  | 0.577146  |
| 1             | -0.007527 | -1.516901 | 1.052452  |
| 1             | -0.089781 | 0.751078  | -1.538437 |
| 1             | -1.260087 | 1.733452  | -2.128959 |
| 1             | 3.844742  | 1.127995  | -0.612389 |
| 1             | 1.854912  | -2.643267 | -0.137379 |
| 1             | 3.769390  | -1.318469 | -0.977841 |
| 6             | -2.162293 | -0.467316 | 0.150103  |
| 8             | -2.203721 | -1.320091 | -0.872811 |
| 8             | -2.459398 | -0.769887 | 1.265607  |
| 1             | -1.875801 | -0.819695 | -1.647581 |
| 1             | -2.622128 | 1.528747  | -0.330739 |

Vibrational frequencies (cm<sup>-1</sup>)

|         |         |         |
|---------|---------|---------|
| -253.70 | 33.61   | 53.85   |
| 71.63   | 97.34   | 136.75  |
| 210.99  | 292.36  | 325.73  |
| 406.63  | 414.09  | 424.85  |
| 503.27  | 549.43  | 579.65  |
| 613.30  | 618.99  | 715.23  |
| 736.13  | 762.93  | 796.16  |
| 856.86  | 884.75  | 892.77  |
| 903.82  | 946.97  | 991.38  |
| 998.03  | 1015.18 | 1021.16 |
| 1033.36 | 1045.69 | 1067.45 |
| 1085.54 | 1119.46 | 1144.04 |
| 1181.08 | 1201.59 | 1206.39 |
| 1218.92 | 1269.63 | 1292.92 |
| 1330.11 | 1340.63 | 1373.38 |
| 1446.41 | 1506.45 | 1513.39 |
| 1650.84 | 1655.02 | 1664.47 |
| 1917.05 | 2282.67 | 2991.78 |
| 3032.92 | 3202.85 | 3210.46 |
| 3217.52 | 3224.34 | 3231.09 |
| 3525.44 | 3559.31 | 3627.33 |

**Benzene**

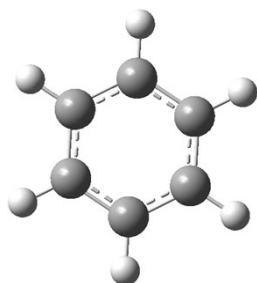

| Atomic Number | X         | Z         | Y         |
|---------------|-----------|-----------|-----------|
| 6             | 0.085092  | 1.388476  | 0.000002  |
| 6             | 1.245041  | 0.620550  | -0.000003 |
| 6             | -1.159952 | 0.767912  | -0.000003 |
| 6             | 1.159951  | -0.767912 | -0.000002 |
| 6             | -1.245041 | -0.620549 | -0.000001 |
| 6             | -0.085092 | -1.388476 | 0.000002  |
| 1             | 0.151344  | 2.470014  | 0.000020  |
| 1             | 2.214832  | 1.103917  | -0.000002 |
| 1             | -2.063415 | 1.366144  | -0.000003 |
| 1             | 2.063414  | -1.366144 | -0.000000 |

|   |           |           |           |
|---|-----------|-----------|-----------|
| 1 | -2.214831 | -1.103918 | -0.000000 |
| 1 | -0.151345 | -2.470021 | 0.000011  |

**V-1-i1**

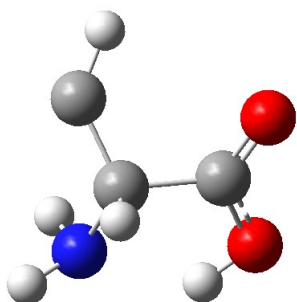

| Atomic Number | X         | Y         | Z         |
|---------------|-----------|-----------|-----------|
| 7             | -1.480644 | -0.920961 | -0.070879 |
| 6             | -1.124001 | 1.536340  | -0.204636 |
| 6             | -0.694953 | 0.248575  | 0.363145  |
| 1             | -0.592137 | 2.320448  | -0.721563 |
| 1             | -1.806148 | -0.780146 | -1.022774 |
| 1             | -2.300208 | -1.044567 | 0.510740  |
| 6             | 0.804408  | -0.002405 | 0.055024  |
| 8             | 1.095015  | -1.284151 | -0.143355 |
| 8             | 1.611461  | 0.876884  | 0.031351  |
| 1             | 0.241656  | -1.760090 | -0.116638 |
| 1             | -0.743183 | 0.274151  | 1.461220  |

**V-1-ts2**

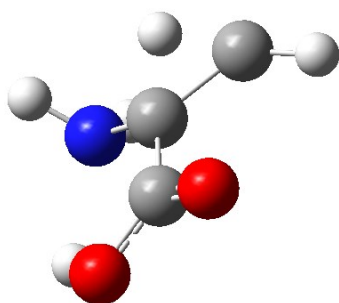

| Atomic Number | X        | Y         | Z         |
|---------------|----------|-----------|-----------|
| 7             | 1.440793 | -1.048458 | -0.014384 |
| 6             | 1.269828 | 1.453968  | 0.176328  |
| 6             | 0.677393 | 0.152255  | -0.126781 |
| 1             | 0.891313 | 2.327594  | 0.686423  |
| 1             | 2.232550 | -0.939482 | 0.608874  |
| 1             | 1.757812 | -1.418558 | -0.901945 |

|   |           |           |           |
|---|-----------|-----------|-----------|
| 6 | -0.804673 | 0.043709  | -0.026524 |
| 8 | -1.241520 | -1.212369 | 0.147720  |
| 8 | -1.542142 | 0.987575  | -0.107160 |
| 1 | -0.456882 | -1.770362 | 0.271351  |
| 1 | 0.903666  | 1.038778  | -1.026639 |

Vibrational frequencies (cm<sup>-1</sup>)

|          |         |         |
|----------|---------|---------|
| -1844.00 | 108.51  | 249.04  |
| 288.67   | 323.47  | 366.29  |
| 407.40   | 561.23  | 584.16  |
| 719.01   | 751.25  | 809.33  |
| 819.17   | 890.34  | 1013.82 |
| 1172.14  | 1185.47 | 1290.98 |
| 1335.77  | 1425.52 | 1654.42 |
| 1867.68  | 2231.08 | 3251.85 |
| 3546.98  | 3631.69 | 3732.71 |

### V-1-i2

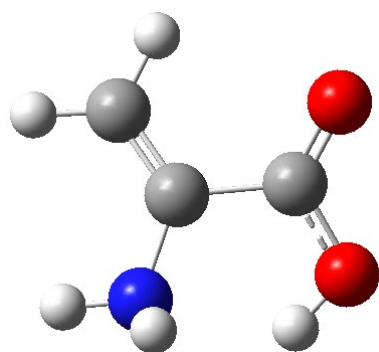

| Atomic Number | X         | Y         | Z         |
|---------------|-----------|-----------|-----------|
| 7             | -1.286549 | -1.166697 | 0.116724  |
| 6             | -1.352153 | 1.265507  | -0.173679 |
| 6             | -0.706142 | 0.122398  | 0.028796  |
| 1             | -2.434162 | 1.313145  | -0.202036 |
| 1             | -2.279970 | -1.157759 | -0.075712 |
| 1             | -1.125964 | -1.602423 | 1.019747  |
| 6             | 0.805079  | 0.120397  | 0.026648  |
| 8             | 1.344862  | -1.081393 | -0.231815 |
| 8             | 1.470516  | 1.091183  | 0.225069  |
| 1             | 0.624881  | -1.685668 | -0.466917 |
| 1             | -0.782667 | 2.171457  | -0.328775 |

### V-1-ts3

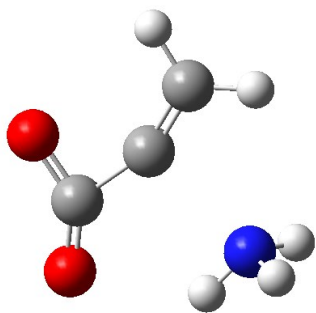

| Atomic Number                               | X         | Y         | Z         |
|---------------------------------------------|-----------|-----------|-----------|
| 7                                           | 1.906930  | -0.807885 | -0.000007 |
| 6                                           | 0.687228  | 1.809435  | 0.000011  |
| 6                                           | 0.155447  | 0.619376  | 0.000016  |
| 1                                           | 1.761744  | 1.913711  | 0.000028  |
| 1                                           | 2.497540  | -0.859919 | 0.822632  |
| 1                                           | 2.497302  | -0.859930 | -0.822818 |
| 6                                           | -0.909332 | -0.381444 | 0.000004  |
| 8                                           | -0.921735 | -1.580989 | 0.000014  |
| 8                                           | -1.707517 | 0.594691  | -0.000020 |
| 1                                           | 1.282958  | -1.613077 | 0.000084  |
| 1                                           | 0.045899  | 2.680600  | -0.000010 |
| Vibrational frequencies (cm <sup>-1</sup> ) |           |           |           |
| -549.94                                     | 96.55     |           | 144.57    |
| 200.02                                      | 258.04    |           | 284.99    |
| 331.37                                      | 402.44    |           | 530.10    |
| 595.06                                      | 658.39    |           | 731.46    |
| 874.30                                      | 917.09    |           | 935.30    |
| 1128.55                                     | 1330.96   |           | 1373.15   |
| 1650.38                                     | 1686.57   |           | 1780.43   |
| 1985.13                                     | 3199.28   |           | 3304.47   |
| 3481.35                                     | 3607.09   |           | 3646.81   |

### V-1-i3

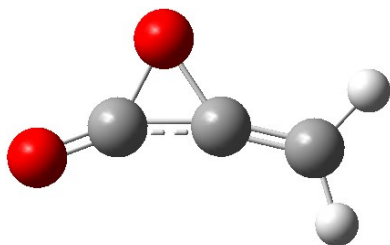

| Atomic Number | X        | Y         | Z        |
|---------------|----------|-----------|----------|
| 6             | 1.931150 | -0.393612 | 0.000008 |
| 6             | 0.655714 | -0.096279 | 0.000002 |
| 1             | 2.237240 | -1.429427 | 0.000028 |

|   |           |           |           |
|---|-----------|-----------|-----------|
| 6 | -0.759217 | -0.107093 | 0.000002  |
| 8 | -1.857621 | -0.519347 | 0.000010  |
| 8 | -0.127187 | 1.096814  | -0.000021 |
| 1 | 2.675345  | 0.391598  | -0.000007 |

### V-2-ts3

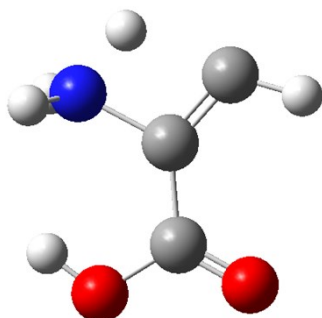

| Atomic Number | X         | Y         | Z         |
|---------------|-----------|-----------|-----------|
| 7             | -1.556718 | -0.912961 | -0.000025 |
| 6             | -1.415152 | 1.340108  | 0.000021  |
| 6             | -0.613418 | 0.273536  | 0.000015  |
| 1             | -2.321810 | -0.038786 | -0.000026 |
| 1             | -1.575495 | -1.489695 | -0.841711 |
| 1             | -1.575544 | -1.489722 | 0.841642  |
| 6             | 0.859239  | 0.095298  | 0.000003  |
| 8             | 1.341184  | -1.180366 | 0.000013  |
| 8             | 1.619088  | 1.013386  | -0.000027 |
| 1             | 0.631236  | -1.824728 | 0.000106  |
| 1             | -0.927561 | 2.315853  | 0.000041  |

### Vibrational frequencies (cm<sup>-1</sup>)

|          |         |         |
|----------|---------|---------|
| -1149.20 | 54.78   | 220.01  |
| 245.18   | 379.96  | 458.35  |
| 483.28   | 510.24  | 715.17  |
| 753.41   | 856.50  | 928.68  |
| 950.45   | 1044.61 | 1085.77 |
| 1147.34  | 1176.62 | 1317.76 |
| 1472.26  | 1578.86 | 1612.75 |
| 1901.80  | 2112.91 | 3156.54 |
| 3449.87  | 3550.99 | 3928.94 |

### V-2-i3

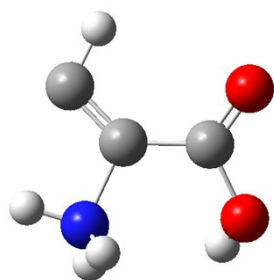

| Atomic Number | X         | Y         | Z         |
|---------------|-----------|-----------|-----------|
| 7             | -1.462682 | -0.946213 | 0.191584  |
| 6             | -1.418125 | 1.417065  | -0.194756 |
| 6             | -0.641090 | 0.352311  | -0.062875 |
| 1             | -2.392351 | -0.524286 | 0.313724  |
| 1             | -1.505681 | -1.601842 | -0.590147 |
| 1             | -1.177532 | -1.455948 | 1.030090  |
| 6             | 0.817726  | 0.121247  | 0.007655  |
| 8             | 1.226119  | -1.196991 | -0.147452 |
| 8             | 1.627138  | 0.964854  | 0.225052  |
| 1             | 0.747150  | -1.597204 | -0.878453 |
| 1             | -0.809933 | 2.316128  | -0.337243 |

### V-2-ts4

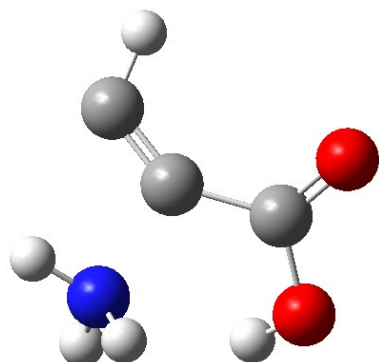

| Atomic Number | X         | Y         | Z         |
|---------------|-----------|-----------|-----------|
| 7             | -1.527674 | -0.970046 | 0.293565  |
| 6             | -1.345157 | 1.491862  | -0.284135 |
| 6             | -0.569890 | 0.496330  | -0.088944 |
| 1             | -2.381301 | -0.473123 | 0.544310  |
| 1             | -1.740513 | -1.578355 | -0.495593 |
| 1             | -1.196151 | -1.534521 | 1.075668  |
| 6             | 0.848454  | 0.088010  | 0.016171  |
| 8             | 1.147437  | -1.200132 | -0.332977 |
| 8             | 1.711235  | 0.822432  | 0.381344  |



|                                             |           |           |           |
|---------------------------------------------|-----------|-----------|-----------|
| 1                                           | 0.474979  | -1.532215 | -0.932935 |
| 1                                           | -0.933115 | 2.472920  | -0.491893 |
| Vibrational frequencies (cm <sup>-1</sup> ) |           |           |           |
| -462.05                                     | 60.25     |           | 118.41    |
| 225.31                                      | 277.22    |           | 365.96    |
| 454.28                                      | 517.07    |           | 576.40    |
| 677.04                                      | 749.14    |           | 784.42    |
| 805.77                                      | 880.30    |           | 946.15    |
| 1157.24                                     | 1268.84   |           | 1289.83   |
| 1620.22                                     | 1661.40   |           | 1746.60   |
| 1906.57                                     | 3233.67   |           | 3428.72   |
| 3571.72                                     | 3579.85   |           | 3909.17   |

### V-2-i4

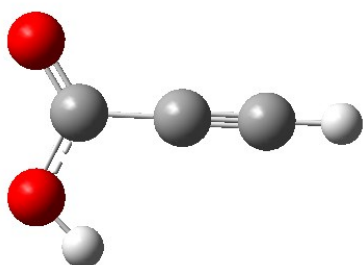

| Atomic Number | X         | Y         | Z         |
|---------------|-----------|-----------|-----------|
| 6             | 2.139303  | 0.005930  | 0.000046  |
| 6             | 0.941992  | 0.057118  | -0.000185 |
| 6             | -0.522024 | 0.129371  | 0.000032  |
| 8             | -1.129452 | -1.069374 | -0.000040 |
| 8             | -1.131534 | 1.149868  | 0.000042  |
| 1             | -0.471523 | -1.772539 | 0.000389  |
| 1             | 3.203781  | -0.025925 | 0.000236  |

### VI-1-ts1

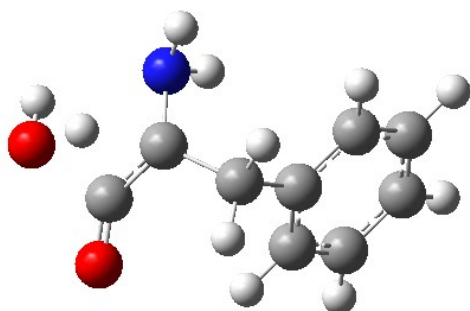

| Atomic Number | X         | Y        | Z         |
|---------------|-----------|----------|-----------|
| 7             | -1.339097 | 1.515379 | -0.824723 |

|   |           |           |           |
|---|-----------|-----------|-----------|
| 6 | -0.401480 | 0.498616  | 1.322683  |
| 6 | -1.522343 | 0.612757  | 0.302686  |
| 6 | 0.921986  | 0.166865  | 0.670034  |
| 6 | 1.858618  | 1.163097  | 0.396995  |
| 6 | 1.195671  | -1.141502 | 0.261732  |
| 6 | 3.048151  | 0.863134  | -0.261703 |
| 6 | 2.382787  | -1.443848 | -0.393043 |
| 6 | 3.313139  | -0.442016 | -0.656982 |
| 1 | -0.661130 | -0.266536 | 2.058467  |
| 1 | -0.320257 | 1.449387  | 1.858176  |
| 1 | 1.658363  | 2.181960  | 0.714050  |
| 1 | 0.466170  | -1.920588 | 0.458430  |
| 1 | -0.432964 | 1.359856  | -1.262487 |
| 1 | -1.356311 | 2.479588  | -0.512302 |
| 1 | 3.767708  | 1.648519  | -0.461245 |
| 1 | 2.584483  | -2.464225 | -0.697007 |
| 1 | 4.239471  | -0.679701 | -1.165912 |
| 6 | -2.171434 | -0.607864 | -0.049578 |
| 8 | -3.555910 | 0.046708  | -0.633534 |
| 8 | -2.194986 | -1.753183 | 0.194440  |
| 1 | -3.300556 | 0.488276  | -1.458021 |
| 1 | -3.014704 | 0.752186  | 0.196720  |

Vibrational frequencies (cm<sup>-1</sup>)

|          |         |         |
|----------|---------|---------|
| -1736.86 | 32.57   | 68.56   |
| 76.66    | 142.98  | 210.88  |
| 235.92   | 311.53  | 364.74  |
| 385.18   | 413.87  | 431.17  |
| 452.98   | 486.94  | 558.69  |
| 576.71   | 618.49  | 633.29  |
| 660.60   | 712.47  | 726.09  |
| 780.24   | 840.25  | 865.11  |
| 875.78   | 906.12  | 939.41  |
| 949.35   | 1001.86 | 1018.95 |
| 1022.84  | 1033.59 | 1063.42 |
| 1107.79  | 1160.47 | 1178.74 |
| 1206.24  | 1218.39 | 1228.48 |
| 1233.83  | 1306.21 | 1336.65 |
| 1357.40  | 1370.86 | 1469.12 |
| 1478.25  | 1496.14 | 1539.57 |
| 1659.02  | 1679.40 | 1679.83 |
| 1871.51  | 2012.24 | 3065.99 |
| 3116.98  | 3186.31 | 3196.35 |
| 3206.23  | 3215.55 | 3226.74 |
| 3496.22  | 3592.61 | 3796.88 |

### VI-1-i1

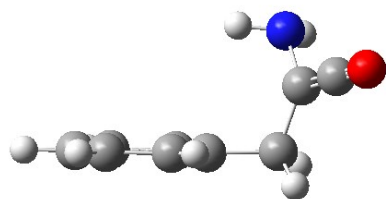

| Atomic Number | X         | Y         | Z         |
|---------------|-----------|-----------|-----------|
| 7             | 1.631878  | -1.361798 | -1.115473 |
| 6             | 0.806742  | -0.358069 | 1.116466  |
| 6             | 1.794960  | -0.451425 | -0.027326 |
| 6             | -0.584879 | -0.073917 | 0.594442  |
| 6             | -1.525672 | -1.094171 | 0.475257  |
| 6             | -0.927070 | 1.209688  | 0.165761  |
| 6             | -2.789497 | -0.838570 | -0.051074 |
| 6             | -2.187236 | 1.470112  | -0.354928 |
| 6             | -3.123204 | 0.444414  | -0.465018 |
| 1             | 1.112374  | 0.422789  | 1.818116  |
| 1             | 0.801978  | -1.304413 | 1.669349  |
| 1             | -1.268337 | -2.095872 | 0.804398  |
| 1             | -0.193965 | 2.006834  | 0.240148  |
| 1             | 0.744043  | -1.202762 | -1.581982 |
| 1             | 1.653242  | -2.323178 | -0.792104 |
| 1             | -3.511842 | -1.641935 | -0.134545 |
| 1             | -2.441853 | 2.473092  | -0.676286 |
| 1             | -4.106551 | 0.646879  | -0.871855 |
| 6             | 2.836024  | 0.357349  | -0.083370 |
| 8             | 3.748345  | 1.069837  | -0.111023 |

### VI-1-ts2

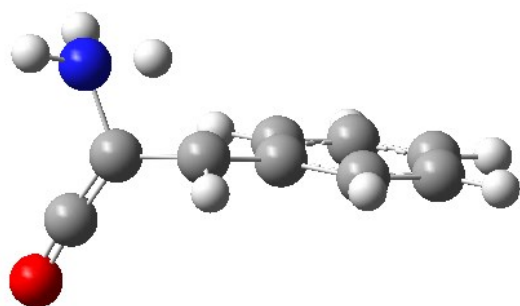

| Atomic Number | X         | Y        | Z         |
|---------------|-----------|----------|-----------|
| 7             | -2.346744 | 0.958167 | -1.370466 |

|   |           |           |           |
|---|-----------|-----------|-----------|
| 6 | -0.718845 | 1.066895  | 0.355371  |
| 6 | -1.935843 | 0.360538  | -0.075669 |
| 6 | 0.597361  | 0.442015  | 0.184065  |
| 6 | 0.807590  | -0.686438 | -0.625644 |
| 6 | 1.728044  | 1.009070  | 0.796553  |
| 6 | 2.078130  | -1.211511 | -0.818336 |
| 6 | 2.997498  | 0.487577  | 0.597868  |
| 6 | 3.186736  | -0.628428 | -0.212905 |
| 1 | -0.812169 | 1.692515  | 1.240896  |
| 1 | -1.415808 | 1.648857  | -1.099878 |
| 1 | -0.043198 | -1.170368 | -1.096114 |
| 1 | 1.595892  | 1.875780  | 1.436283  |
| 1 | -2.228711 | 0.366743  | -2.196347 |
| 1 | -3.257650 | 1.421083  | -1.388832 |
| 1 | 2.203176  | -2.088186 | -1.444507 |
| 1 | 3.847153  | 0.951468  | 1.086698  |
| 1 | 4.177248  | -1.039749 | -0.363454 |
| 6 | -2.577154 | -0.615409 | 0.521550  |
| 8 | -3.077478 | -1.463897 | 1.135174  |

Vibrational frequencies (cm<sup>-1</sup>)

|          |         |         |
|----------|---------|---------|
| -1357.99 | 49.13   | 58.32   |
| 91.84    | 165.50  | 227.83  |
| 283.15   | 367.63  | 396.26  |
| 415.25   | 500.82  | 541.80  |
| 581.62   | 601.92  | 631.14  |
| 649.35   | 706.34  | 715.06  |
| 779.44   | 823.04  | 856.66  |
| 894.39   | 915.96  | 985.19  |
| 1006.56  | 1009.88 | 1060.12 |
| 1062.39  | 1069.55 | 1108.14 |
| 1130.38  | 1173.08 | 1198.61 |
| 1233.07  | 1306.53 | 1344.95 |
| 1357.14  | 1425.82 | 1479.75 |
| 1494.56  | 1532.70 | 1580.73 |
| 1645.12  | 1674.10 | 1950.92 |
| 2240.79  | 3123.55 | 3157.74 |
| 3159.70  | 3177.55 | 3191.11 |
| 3214.37  | 3393.97 | 3502.52 |

**VI-1-i2**

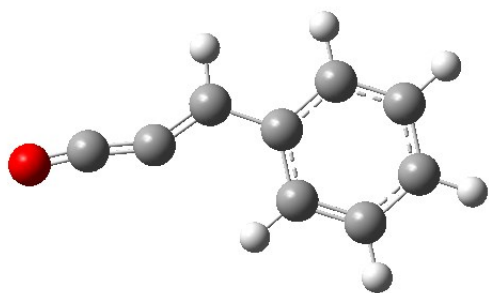

| Atomic Number | X         | Y         | Z         |
|---------------|-----------|-----------|-----------|
| 6             | -0.952114 | 0.828568  | -0.000072 |
| 6             | -2.032154 | 0.050744  | -0.000049 |
| 6             | 0.429161  | 0.349692  | -0.000040 |
| 6             | 0.725845  | -1.019419 | -0.000049 |
| 6             | 1.475401  | 1.277407  | 0.000008  |
| 6             | 2.043151  | -1.445102 | -0.000009 |
| 6             | 2.796023  | 0.849234  | 0.000053  |
| 6             | 3.080019  | -0.512121 | 0.000045  |
| 1             | -1.060258 | 1.915567  | -0.000113 |
| 1             | -0.094550 | -1.728166 | -0.000090 |
| 1             | 1.246386  | 2.338006  | 0.000015  |
| 1             | 2.269104  | -2.504567 | -0.000018 |
| 1             | 3.601920  | 1.572771  | 0.000093  |
| 1             | 4.109693  | -0.849734 | 0.000075  |
| 6             | -3.314650 | -0.064942 | 0.000008  |
| 8             | -4.447048 | -0.328530 | 0.000083  |

### VI-2-ts2

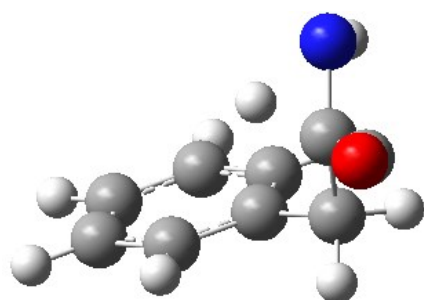

| Atomic Number | X         | Y         | Z         |
|---------------|-----------|-----------|-----------|
| 7             | 1.636250  | -1.294703 | -1.158374 |
| 6             | 0.789887  | -0.199332 | 1.024015  |
| 6             | 1.753169  | -0.295885 | -0.152691 |
| 6             | -0.630464 | -0.019529 | 0.545345  |
| 6             | -1.511354 | -1.096092 | 0.485621  |
| 6             | -1.066559 | 1.234269  | 0.115297  |

|   |           |           |           |
|---|-----------|-----------|-----------|
| 6 | -2.806157 | -0.926178 | 0.005473  |
| 6 | -2.358500 | 1.407947  | -0.363746 |
| 6 | -3.231830 | 0.325940  | -0.420412 |
| 1 | 1.079014  | 0.628393  | 1.678785  |
| 1 | 0.871833  | -1.123292 | 1.606291  |
| 1 | -1.183884 | -2.073956 | 0.823479  |
| 1 | -0.386957 | 2.079985  | 0.160493  |
| 1 | 1.411653  | 0.146269  | -1.175702 |
| 1 | 0.954489  | -1.981278 | -0.823881 |
| 1 | -3.481191 | -1.772644 | -0.034868 |
| 1 | -2.686060 | 2.387559  | -0.690749 |
| 1 | -4.239663 | 0.459994  | -0.794131 |
| 6 | 3.089877  | 0.179966  | 0.137750  |
| 8 | 4.004825  | 0.830656  | -0.112627 |

Vibrational frequencies (cm<sup>-1</sup>)

|          |         |         |
|----------|---------|---------|
| -1681.64 | 43.27   | 50.64   |
| 90.86    | 124.11  | 236.10  |
| 284.45   | 313.44  | 375.29  |
| 414.03   | 418.23  | 498.75  |
| 544.82   | 605.52  | 633.49  |
| 642.66   | 720.94  | 741.43  |
| 805.81   | 847.53  | 879.14  |
| 908.77   | 951.43  | 987.13  |
| 1006.07  | 1021.35 | 1028.06 |
| 1064.83  | 1070.98 | 1119.64 |
| 1179.92  | 1188.42 | 1204.91 |
| 1221.49  | 1239.41 | 1324.05 |
| 1346.88  | 1357.66 | 1394.41 |
| 1479.98  | 1502.42 | 1544.63 |
| 1669.31  | 1689.25 | 2107.66 |
| 2648.50  | 3046.70 | 3095.35 |
| 3171.61  | 3182.13 | 3196.37 |
| 3204.60  | 3216.95 | 3445.97 |

### VI-3-ts2

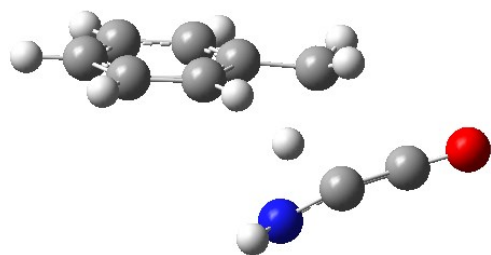

Atomic  
Number

X

Y

Z

|   |           |           |           |
|---|-----------|-----------|-----------|
| 7 | 1.264305  | -1.102767 | -1.475794 |
| 6 | 0.827626  | 0.658220  | 0.839046  |
| 6 | 2.031746  | -0.754110 | -0.430532 |
| 6 | -0.584401 | 0.422415  | 0.521260  |
| 6 | -1.238225 | -0.722066 | 1.009038  |
| 6 | -1.266898 | 1.242327  | -0.391312 |
| 6 | -2.547536 | -0.997609 | 0.647454  |
| 6 | -2.577331 | 0.963562  | -0.750496 |
| 6 | -3.223668 | -0.153002 | -0.229501 |
| 1 | 1.195070  | 1.659296  | 0.636919  |
| 1 | 1.172011  | 0.226646  | 1.771591  |
| 1 | -0.708510 | -1.381495 | 1.688987  |
| 1 | -0.761206 | 2.107834  | -0.805529 |
| 1 | 0.868342  | -0.188080 | -0.440360 |
| 1 | 0.776844  | -1.965224 | -1.229225 |
| 1 | -3.043286 | -1.874047 | 1.047213  |
| 1 | -3.094984 | 1.615734  | -1.443416 |
| 1 | -4.246683 | -0.370098 | -0.511756 |
| 6 | 3.075372  | -0.000342 | -0.119651 |
| 8 | 4.001519  | 0.491554  | 0.380539  |

Vibrational frequencies (cm<sup>-1</sup>)

|          |         |         |
|----------|---------|---------|
| -2161.60 | 10.88   | 37.86   |
| 47.67    | 78.45   | 185.48  |
| 226.23   | 327.03  | 349.14  |
| 380.52   | 404.06  | 435.01  |
| 470.71   | 517.61  | 561.19  |
| 618.37   | 629.50  | 706.92  |
| 763.97   | 782.10  | 828.75  |
| 860.02   | 904.36  | 933.43  |
| 988.65   | 997.70  | 1008.63 |
| 1020.13  | 1026.87 | 1050.91 |
| 1060.86  | 1123.19 | 1178.47 |
| 1197.95  | 1221.89 | 1251.16 |
| 1338.48  | 1351.89 | 1462.96 |
| 1492.26  | 1493.89 | 1529.83 |
| 1649.39  | 1671.20 | 1906.07 |
| 2210.40  | 3132.27 | 3168.84 |
| 3176.30  | 3190.36 | 3196.13 |
| 3211.20  | 3231.12 | 3462.33 |

**VI-3-i2**

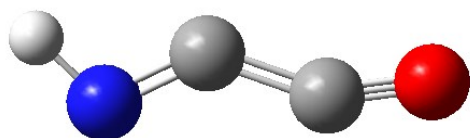

| Atomic Number | X         | Y         | Z         |
|---------------|-----------|-----------|-----------|
| 7             | -1.752668 | -0.230756 | 0.000005  |
| 6             | -0.629185 | 0.318480  | -0.000009 |
| 1             | -2.488942 | 0.482044  | 0.000025  |
| 6             | 0.669961  | -0.143006 | -0.000015 |
| 8             | 1.814120  | 0.010050  | 0.000011  |

### VI-3-ts3

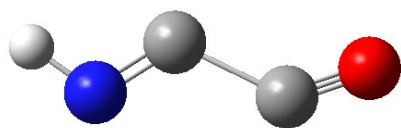

| Atomic Number | X         | Y         | Z         |
|---------------|-----------|-----------|-----------|
| 7             | -1.749659 | -0.237122 | -0.000041 |
| 6             | -0.713534 | 0.413700  | 0.000058  |
| 1             | -2.582964 | 0.350881  | -0.000090 |
| 6             | 0.748720  | -0.296225 | 0.000082  |
| 8             | 1.827433  | 0.075516  | -0.000058 |

Vibrational frequencies (cm<sup>-1</sup>)

|         |         |         |
|---------|---------|---------|
| -456.06 | 184.48  | 331.80  |
| 565.46  | 844.31  | 944.07  |
| 1821.46 | 2126.07 | 3550.72 |

### VII-ts

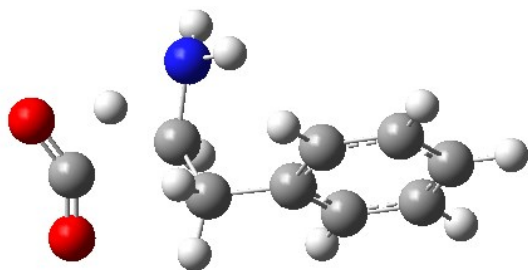

| Atomic Number | X         | Y         | Z         |
|---------------|-----------|-----------|-----------|
| 8             | -3.741363 | 0.782265  | 0.016620  |
| 8             | -3.226329 | -1.431450 | 0.393828  |
| 7             | -1.072645 | 1.405419  | -1.044017 |



|   |           |           |           |
|---|-----------|-----------|-----------|
| 6 | -0.478306 | -0.206765 | 0.744738  |
| 6 | -1.314565 | 0.055508  | -0.498357 |
| 6 | 0.999998  | -0.166865 | 0.437064  |
| 6 | 1.780969  | 0.928884  | 0.803196  |
| 6 | 1.601089  | -1.213565 | -0.265878 |
| 6 | -3.145188 | -0.293588 | 0.098364  |
| 6 | 3.132898  | 0.983310  | 0.472450  |
| 6 | 2.949020  | -1.164372 | -0.594092 |
| 6 | 3.718762  | -0.062827 | -0.227891 |
| 1 | -0.765737 | -1.181354 | 1.143118  |
| 1 | -0.718521 | 0.546315  | 1.502820  |
| 1 | -1.229185 | -0.739313 | -1.239541 |
| 1 | 1.330133  | 1.739466  | 1.368287  |
| 1 | 1.005611  | -2.076757 | -0.547411 |
| 1 | -1.174756 | 1.448343  | -2.048429 |
| 1 | -0.176562 | 1.789885  | -0.762417 |
| 1 | 3.726356  | 1.840511  | 0.767873  |
| 1 | 3.404251  | -1.987898 | -1.131531 |
| 1 | 4.770956  | -0.025984 | -0.483027 |
| 1 | -2.390553 | 0.844000  | -0.362771 |

Vibrational frequencies (cm<sup>-1</sup>)

|          |         |         |
|----------|---------|---------|
| -1615.96 | 34.11   | 53.56   |
| 69.77    | 92.30   | 142.98  |
| 225.27   | 257.91  | 287.66  |
| 293.30   | 363.15  | 412.62  |
| 423.40   | 500.40  | 577.09  |
| 633.62   | 639.22  | 688.02  |
| 722.44   | 760.80  | 779.69  |
| 795.04   | 826.28  | 873.77  |
| 881.03   | 925.81  | 953.22  |
| 986.18   | 1006.71 | 1019.54 |
| 1025.97  | 1036.19 | 1065.88 |
| 1105.26  | 1146.09 | 1182.57 |
| 1194.75  | 1209.50 | 1234.97 |
| 1255.50  | 1290.65 | 1336.88 |
| 1354.52  | 1358.61 | 1378.96 |
| 1441.75  | 1485.57 | 1500.15 |
| 1543.70  | 1642.91 | 1663.44 |
| 1684.15  | 2139.17 | 3052.23 |
| 3112.31  | 3123.32 | 3167.23 |
| 3187.04  | 3197.69 | 3207.82 |
| 3219.12  | 3529.69 | 3657.68 |

**Phenethylamine**

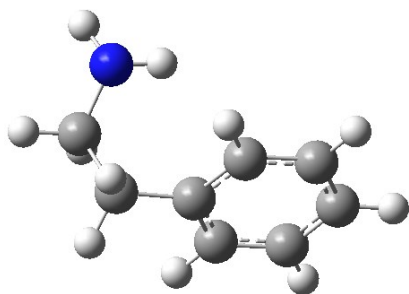

| Atomic Number | X         | Y         | Z         |
|---------------|-----------|-----------|-----------|
| 7             | 2.417367  | -0.972157 | -0.742693 |
| 6             | 1.472677  | 0.589813  | 0.896572  |
| 6             | 2.437559  | 0.414644  | -0.281540 |
| 6             | 0.048596  | 0.293799  | 0.497699  |
| 6             | -0.473969 | -0.995447 | 0.619110  |
| 6             | -0.756893 | 1.289884  | -0.056845 |
| 6             | -1.768145 | -1.281248 | 0.197217  |
| 6             | -2.051291 | 1.008711  | -0.477902 |
| 6             | -2.560875 | -0.279563 | -0.352102 |
| 1             | 1.547003  | 1.614198  | 1.271783  |
| 1             | 1.783778  | -0.087191 | 1.695707  |
| 1             | 2.178687  | 1.146223  | -1.062301 |
| 1             | 0.148927  | -1.776480 | 1.042186  |
| 1             | -0.363686 | 2.297300  | -0.153848 |
| 1             | 3.122225  | -1.113268 | -1.457363 |
| 1             | 1.520165  | -1.173094 | -1.174008 |
| 1             | -2.159489 | -2.286546 | 0.301620  |
| 1             | -2.664867 | 1.795780  | -0.900471 |
| 1             | -3.570822 | -0.500135 | -0.676455 |
| 1             | 3.450556  | 0.644755  | 0.058743  |

### VII-1-ts1

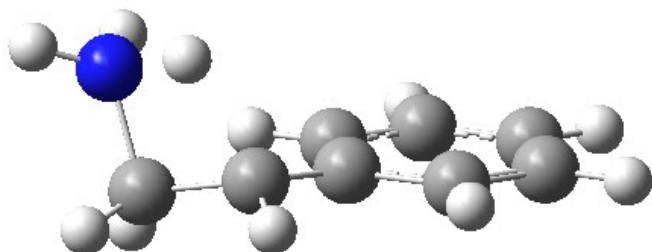

| Atomic Number | X         | Y         | Z         |
|---------------|-----------|-----------|-----------|
| 7             | -2.868561 | 0.567959  | 0.680458  |
| 6             | -1.333996 | -0.991360 | -0.115820 |

|   |           |           |           |
|---|-----------|-----------|-----------|
| 6 | -2.433186 | -0.125832 | -0.634308 |
| 6 | 0.017675  | -0.452356 | -0.094647 |
| 6 | 0.308045  | 0.922319  | -0.217542 |
| 6 | 1.124681  | -1.304273 | 0.110217  |
| 6 | 1.608428  | 1.408156  | -0.138251 |
| 6 | 2.416807  | -0.817363 | 0.194988  |
| 6 | 2.678009  | 0.548089  | 0.073331  |
| 1 | -1.409844 | -2.045610 | -0.362076 |
| 1 | -2.217419 | -0.281980 | 1.147267  |
| 1 | -2.190832 | 0.652833  | -1.363755 |
| 1 | -0.490426 | 1.638568  | -0.397314 |
| 1 | 0.944574  | -2.370462 | 0.202694  |
| 1 | -3.869329 | 0.637869  | 0.866934  |
| 1 | -2.423252 | 1.475586  | 0.809409  |
| 1 | 1.784238  | 2.473388  | -0.244755 |
| 1 | 3.236269  | -1.510629 | 0.351702  |
| 1 | 3.689884  | 0.927387  | 0.139947  |
| 1 | -3.292707 | -0.696938 | -0.981063 |

Vibrational frequencies (cm<sup>-1</sup>)

|          |         |         |
|----------|---------|---------|
| -1250.90 | 68.45   | 112.55  |
| 191.40   | 263.36  | 291.42  |
| 392.43   | 419.84  | 516.85  |
| 547.52   | 620.21  | 635.68  |
| 712.45   | 753.03  | 773.04  |
| 782.92   | 822.73  | 842.40  |
| 886.39   | 895.24  | 977.43  |
| 998.60   | 1002.94 | 1035.37 |
| 1064.29  | 1072.17 | 1098.02 |
| 1134.34  | 1172.91 | 1208.15 |
| 1233.92  | 1261.19 | 1314.43 |
| 1326.20  | 1353.37 | 1397.58 |
| 1487.80  | 1501.94 | 1512.15 |
| 1536.19  | 1586.59 | 1630.53 |
| 1672.82  | 2022.92 | 3067.11 |
| 3151.64  | 3157.22 | 3179.54 |
| 3184.07  | 3194.91 | 3201.88 |
| 3225.32  | 3459.56 | 3578.94 |

**Styrene**

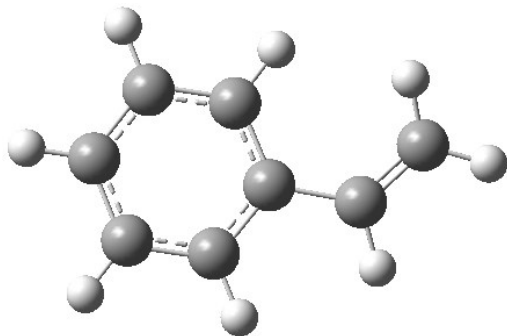

| Atomic Number | X         | Y         | Z         |
|---------------|-----------|-----------|-----------|
| 6             | 1.954207  | -0.520468 | -0.107516 |
| 6             | 2.942238  | 0.334340  | 0.143978  |
| 6             | 0.510886  | -0.222244 | -0.064205 |
| 6             | 0.011990  | 1.085003  | -0.090103 |
| 6             | -0.400521 | -1.279476 | 0.002437  |
| 6             | -1.353027 | 1.323248  | -0.028833 |
| 6             | -1.768454 | -1.042986 | 0.065096  |
| 6             | -2.249494 | 0.260558  | 0.052495  |
| 1             | 2.204264  | -1.549852 | -0.352310 |
| 1             | 2.757635  | 1.364993  | 0.425117  |
| 1             | 0.697024  | 1.920092  | -0.177720 |
| 1             | -0.027281 | -2.298106 | 0.012242  |
| 1             | -1.722180 | 2.341721  | -0.053649 |
| 1             | -2.458014 | -1.876820 | 0.121210  |
| 1             | -3.315238 | 0.449505  | 0.097158  |
| 1             | 3.976841  | 0.020615  | 0.087855  |

### VII-2-ts1

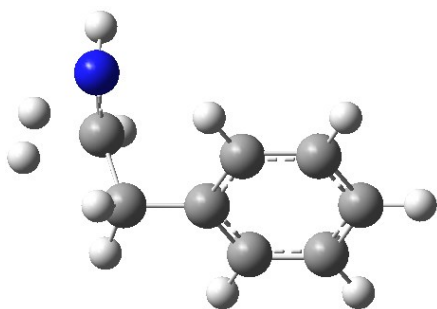

| Atomic Number | X         | Y         | Z         |
|---------------|-----------|-----------|-----------|
| 7             | -2.707901 | 1.029197  | -0.312317 |
| 6             | -1.397022 | -0.809189 | 0.660757  |
| 6             | -2.298063 | -0.282816 | -0.437010 |
| 6             | 0.017210  | -0.370107 | 0.353387  |
| 6             | 0.372232  | 0.978584  | 0.438367  |

|   |           |           |           |
|---|-----------|-----------|-----------|
| 6 | 0.975872  | -1.300650 | -0.044767 |
| 6 | 1.667751  | 1.380368  | 0.137739  |
| 6 | 2.273471  | -0.897935 | -0.343213 |
| 6 | 2.621526  | 0.444364  | -0.251599 |
| 1 | -1.455074 | -1.897844 | 0.713080  |
| 1 | -1.740197 | -0.384203 | 1.605992  |
| 1 | -2.108775 | -0.731968 | -1.417640 |
| 1 | -0.384163 | 1.700246  | 0.722646  |
| 1 | 0.707274  | -2.349899 | -0.112819 |
| 1 | -3.550674 | -0.148821 | -0.110198 |
| 1 | -2.990142 | 1.369912  | -1.228954 |
| 1 | 1.934490  | 2.428260  | 0.207788  |
| 1 | 3.010815  | -1.632606 | -0.644195 |
| 1 | 3.631877  | 0.760644  | -0.482010 |
| 1 | -3.497983 | -1.173809 | -0.149427 |

Vibrational frequencies (cm<sup>-1</sup>)

|          |         |         |
|----------|---------|---------|
| -2339.66 | 58.74   | 123.44  |
| 145.46   | 279.58  | 319.19  |
| 416.46   | 450.01  | 490.89  |
| 518.61   | 632.10  | 643.17  |
| 722.14   | 765.34  | 772.48  |
| 781.65   | 878.39  | 903.58  |
| 920.89   | 948.95  | 1006.28 |
| 1019.45  | 1024.85 | 1035.28 |
| 1064.96  | 1109.44 | 1159.08 |
| 1174.55  | 1179.71 | 1209.47 |
| 1213.37  | 1231.81 | 1267.40 |
| 1315.55  | 1331.01 | 1355.34 |
| 1373.67  | 1448.80 | 1477.98 |
| 1497.24  | 1541.21 | 1658.72 |
| 1680.28  | 1710.24 | 2130.35 |
| 3072.16  | 3088.10 | 3145.70 |
| 3189.57  | 3202.24 | 3211.27 |
| 3220.76  | 3227.47 | 3522.42 |

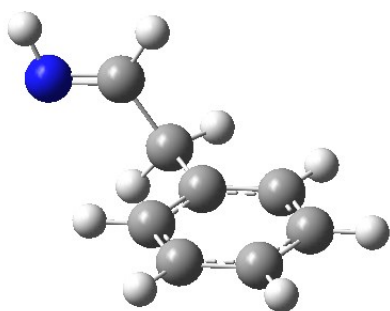

| Atomic Number | X         | Y         | Z         |
|---------------|-----------|-----------|-----------|
| 7             | -3.242491 | 0.659047  | -0.175544 |
| 6             | -1.454773 | -0.777422 | 0.577925  |
| 6             | -2.378766 | -0.216885 | -0.469353 |
| 6             | -0.027047 | -0.356131 | 0.299311  |
| 6             | 0.307471  | 0.999248  | 0.334979  |
| 6             | 0.962656  | -1.285993 | -0.008835 |
| 6             | 1.607404  | 1.413109  | 0.077185  |
| 6             | 2.266339  | -0.873764 | -0.269862 |
| 6             | 2.591607  | 0.476110  | -0.226314 |
| 1             | -1.522257 | -1.868976 | 0.580882  |
| 1             | -1.787599 | -0.405117 | 1.548935  |
| 1             | -2.218776 | -0.593767 | -1.487844 |
| 1             | -0.465360 | 1.725900  | 0.565080  |
| 1             | 0.713281  | -2.341489 | -0.039065 |
| 1             | -3.758991 | 0.943373  | -1.008991 |
| 1             | 1.854754  | 2.467495  | 0.112639  |
| 1             | 3.026880  | -1.608742 | -0.505571 |
| 1             | 3.606163  | 0.798370  | -0.427467 |

### VII-2-ts2

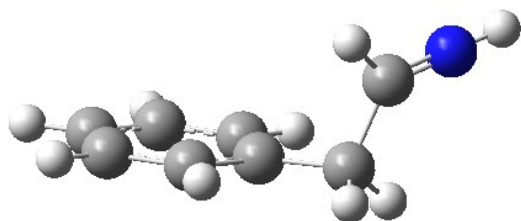

| Atomic Number | X         | Y         | Z         |
|---------------|-----------|-----------|-----------|
| 7             | -3.279193 | 0.519991  | -0.512629 |
| 6             | -1.465669 | -0.537503 | 0.764909  |
| 6             | -2.356022 | -0.292855 | -0.454518 |
| 6             | -0.026790 | -0.245469 | 0.417228  |
| 6             | 0.427090  | 1.074888  | 0.386274  |
| 6             | 0.854491  | -1.264233 | 0.058411  |

|   |           |           |           |
|---|-----------|-----------|-----------|
| 6 | 1.733868  | 1.367924  | 0.019351  |
| 6 | 2.163615  | -0.974184 | -0.313641 |
| 6 | 2.607243  | 0.342434  | -0.331875 |
| 1 | -1.567801 | -1.585638 | 1.064045  |
| 1 | -1.817655 | 0.097565  | 1.578946  |
| 1 | -2.065326 | -0.925029 | -1.319778 |
| 1 | -0.256581 | 1.874642  | 0.652201  |
| 1 | 0.514114  | -2.294361 | 0.078651  |
| 1 | -4.017050 | 1.178159  | -0.547097 |
| 1 | 2.072863  | 2.397110  | 0.006666  |
| 1 | 2.837467  | -1.778225 | -0.585150 |
| 1 | 3.627359  | 0.569839  | -0.616905 |

Vibrational frequencies (cm<sup>-1</sup>)

|          |         |         |
|----------|---------|---------|
| -1158.59 | 24.65   | 51.90   |
| 140.37   | 293.36  | 329.16  |
| 413.59   | 453.86  | 520.73  |
| 577.91   | 633.71  | 676.45  |
| 719.46   | 771.83  | 785.26  |
| 863.30   | 871.35  | 934.34  |
| 997.13   | 998.98  | 1019.74 |
| 1020.17  | 1038.69 | 1062.62 |
| 1112.56  | 1174.23 | 1186.66 |
| 1202.84  | 1230.21 | 1293.62 |
| 1331.28  | 1354.85 | 1419.05 |
| 1476.21  | 1496.27 | 1539.31 |
| 1661.12  | 1679.70 | 1846.54 |
| 2899.08  | 3065.51 | 3137.11 |
| 3191.88  | 3193.21 | 3206.43 |
| 3215.66  | 3226.93 | 3954.59 |

### VII-3-ts2

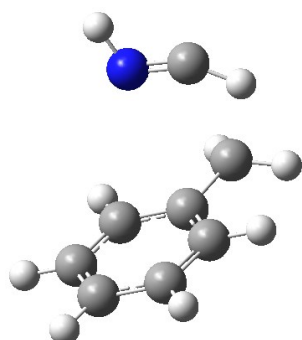

| Atomic Number | X         | Y         | Z         |
|---------------|-----------|-----------|-----------|
| 7             | -2.347951 | 1.073687  | -0.618264 |
| 6             | -1.425999 | -0.969290 | 0.864093  |

|   |           |           |           |
|---|-----------|-----------|-----------|
| 6 | -2.604576 | -0.116645 | -0.723080 |
| 6 | -0.100448 | -0.491411 | 0.512169  |
| 6 | 0.271070  | 0.838951  | 0.760346  |
| 6 | 0.805750  | -1.315045 | -0.178073 |
| 6 | 1.503673  | 1.322045  | 0.336360  |
| 6 | 2.033769  | -0.830275 | -0.596923 |
| 6 | 2.389238  | 0.493846  | -0.342607 |
| 1 | -1.524284 | -2.050922 | 0.967455  |
| 1 | -1.959306 | -0.420639 | 1.634495  |
| 1 | -2.468311 | -1.165719 | -0.424914 |
| 1 | -0.413127 | 1.485028  | 1.295339  |
| 1 | 0.535660  | -2.347375 | -0.377620 |
| 1 | -2.817639 | 1.653428  | -1.316559 |
| 1 | 1.775284  | 2.350796  | 0.542965  |
| 1 | 2.720722  | -1.484620 | -1.120949 |
| 1 | 3.351792  | 0.871155  | -0.666072 |

Vibrational frequencies (cm<sup>-1</sup>)

|          |         |         |
|----------|---------|---------|
| -1301.08 | 44.73   | 101.09  |
| 115.47   | 236.23  | 322.45  |
| 372.66   | 421.50  | 494.40  |
| 526.34   | 553.01  | 632.24  |
| 711.60   | 720.81  | 778.19  |
| 819.86   | 851.39  | 860.97  |
| 889.60   | 928.20  | 990.55  |
| 998.74   | 1014.08 | 1024.98 |
| 1036.06  | 1043.64 | 1061.62 |
| 1123.77  | 1176.17 | 1203.30 |
| 1273.90  | 1331.92 | 1354.78 |
| 1474.61  | 1492.62 | 1537.77 |
| 1644.29  | 1671.81 | 1783.87 |
| 3083.87  | 3109.14 | 3185.54 |
| 3199.88  | 3203.89 | 3209.53 |
| 3222.18  | 3230.83 | 3476.12 |



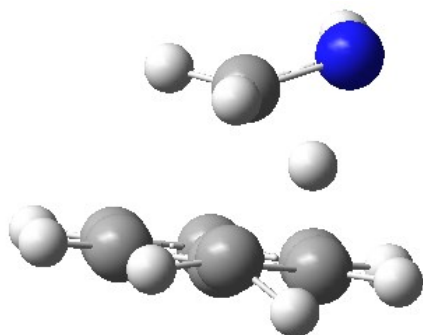

| Atomic Number                               | X         | Y         | Z         |
|---------------------------------------------|-----------|-----------|-----------|
| 7                                           | -2.607066 | 1.049536  | -0.806577 |
| 6                                           | -1.350822 | -0.660623 | 1.063341  |
| 6                                           | -2.583414 | -0.305876 | -0.605213 |
| 6                                           | 0.017230  | -0.354148 | 0.624602  |
| 6                                           | 0.512201  | 0.954375  | 0.726495  |
| 6                                           | 0.800309  | -1.305701 | -0.045576 |
| 6                                           | 1.750976  | 1.292600  | 0.193179  |
| 6                                           | 2.037296  | -0.966925 | -0.574058 |
| 6                                           | 2.519458  | 0.334990  | -0.457979 |
| 1                                           | -1.598967 | -1.717622 | 1.123869  |
| 1                                           | -1.671769 | -0.136974 | 1.968673  |
| 1                                           | -1.996225 | -0.992529 | -1.220365 |
| 1                                           | -0.076506 | 1.706323  | 1.242483  |
| 1                                           | 0.433867  | -2.323459 | -0.135752 |
| 1                                           | -1.788012 | 1.302569  | -1.358127 |
| 1                                           | -2.026074 | 0.433023  | 0.297846  |
| 1                                           | 2.117142  | 2.307960  | 0.290033  |
| 1                                           | 2.631685  | -1.721310 | -1.076293 |
| 1                                           | 3.486585  | 0.597327  | -0.868826 |
| 1                                           | -3.481660 | -0.734211 | -0.166251 |
| Vibrational frequencies (cm <sup>-1</sup> ) |           |           |           |
| -2120.14                                    | 54.52     | 70.76     |           |
| 97.63                                       | 224.87    | 330.10    |           |
| 394.55                                      | 415.95    | 448.05    |           |
| 499.09                                      | 535.61    | 627.66    |           |
| 632.87                                      | 718.96    | 731.99    |           |
| 779.23                                      | 828.91    | 865.94    |           |
| 913.24                                      | 949.04    | 995.70    |           |
| 1000.18                                     | 1015.10   | 1017.28   |           |
| 1045.82                                     | 1062.48   | 1095.58   |           |
| 1121.92                                     | 1174.72   | 1178.84   |           |
| 1204.82                                     | 1228.94   | 1258.39   |           |
| 1282.45                                     | 1326.88   | 1356.44   |           |

|         |         |         |
|---------|---------|---------|
| 1389.65 | 1458.36 | 1494.00 |
| 1518.93 | 1538.56 | 1647.09 |
| 1676.27 | 2114.40 | 3065.16 |
| 3083.78 | 3177.60 | 3179.59 |
| 3187.58 | 3188.23 | 3206.54 |
| 3213.77 | 3228.29 | 3512.09 |

### VII-5-ts1

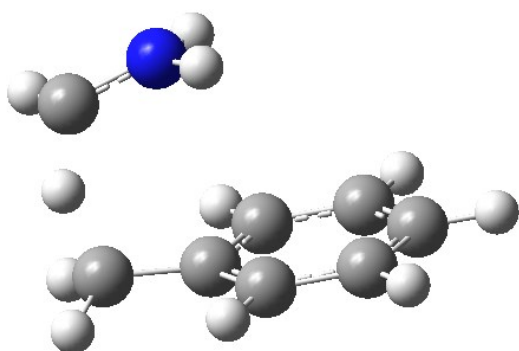

| Atomic Number                               | X         | Y         | Z         |
|---------------------------------------------|-----------|-----------|-----------|
| 7                                           | -1.719389 | 1.229320  | 0.956547  |
| 6                                           | -1.431069 | -1.240247 | -0.805056 |
| 6                                           | -2.634073 | 0.377584  | 0.499723  |
| 6                                           | -0.112521 | -0.709396 | -0.515796 |
| 6                                           | 0.668985  | -1.237164 | 0.528915  |
| 6                                           | 0.360078  | 0.454137  | -1.148112 |
| 6                                           | 1.868607  | -0.647823 | 0.900446  |
| 6                                           | 1.567562  | 1.037948  | -0.782127 |
| 6                                           | 2.329889  | 0.493354  | 0.245856  |
| 1                                           | -1.849871 | -0.983662 | -1.773455 |
| 1                                           | -1.581872 | -2.287764 | -0.547718 |
| 1                                           | -3.169358 | 0.766059  | -0.368208 |
| 1                                           | 0.323987  | -2.128977 | 1.042610  |
| 1                                           | -0.226150 | 0.885919  | -1.954198 |
| 1                                           | -1.120046 | 0.953262  | 1.719833  |
| 1                                           | -1.367724 | 2.008854  | 0.410405  |
| 1                                           | 2.453712  | -1.083985 | 1.702251  |
| 1                                           | 1.915057  | 1.922950  | -1.303382 |
| 1                                           | 3.270418  | 0.947411  | 0.532279  |
| 1                                           | -2.317175 | -0.775671 | 0.300664  |
| Vibrational frequencies (cm <sup>-1</sup> ) |           |           |           |
| -1287.79                                    | 56.30     | 68.83     |           |
| 103.20                                      | 230.29    | 289.73    |           |

|         |         |         |
|---------|---------|---------|
| 346.28  | 366.85  | 416.18  |
| 524.20  | 553.47  | 578.86  |
| 632.58  | 647.95  | 702.28  |
| 716.65  | 773.48  | 835.48  |
| 866.20  | 904.93  | 945.88  |
| 963.69  | 993.97  | 1010.42 |
| 1014.81 | 1018.04 | 1059.76 |
| 1069.65 | 1120.86 | 1174.96 |
| 1200.93 | 1273.42 | 1325.48 |
| 1333.04 | 1351.96 | 1368.95 |
| 1459.42 | 1485.37 | 1490.23 |
| 1537.10 | 1637.75 | 1670.27 |
| 1683.64 | 2169.23 | 3122.95 |
| 3140.19 | 3178.09 | 3186.39 |
| 3201.87 | 3207.33 | 3207.91 |
| 3225.72 | 3525.05 | 3672.93 |

### VIII-1-ts1

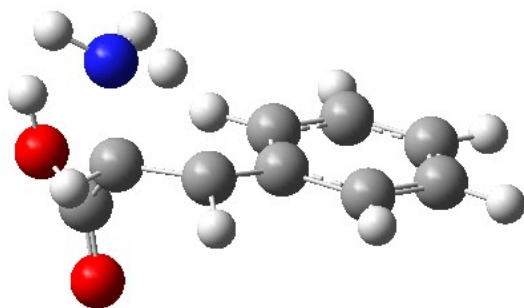

| Atomic Number | X         | Y         | Z         |
|---------------|-----------|-----------|-----------|
| 7             | -1.781875 | 0.929429  | -1.550034 |
| 6             | -0.357846 | 1.489539  | 0.215424  |
| 6             | -1.708897 | 0.896593  | 0.010534  |
| 6             | 0.811329  | 0.632227  | 0.108803  |
| 6             | 0.793140  | -0.665828 | -0.441848 |
| 6             | 2.075392  | 1.119703  | 0.505139  |
| 6             | 1.955977  | -1.413400 | -0.599053 |
| 6             | 3.229278  | 0.375336  | 0.344886  |
| 6             | 3.187428  | -0.901815 | -0.216671 |
| 1             | -0.310358 | 2.269893  | 0.965050  |
| 1             | -0.981529 | 1.716806  | -1.440597 |
| 1             | -0.142854 | -1.146440 | -0.719463 |
| 1             | 2.131536  | 2.110398  | 0.944071  |
| 1             | -1.320305 | 0.122964  | -1.975294 |
| 1             | -2.666064 | 1.147591  | -2.014874 |
| 1             | 1.889075  | -2.412477 | -1.015872 |

|   |           |           |           |
|---|-----------|-----------|-----------|
| 1 | 4.177802  | 0.791132  | 0.667321  |
| 1 | 4.092251  | -1.483139 | -0.339821 |
| 6 | -2.078751 | -0.458935 | 0.633321  |
| 8 | -2.665378 | -1.407382 | -0.149192 |
| 8 | -1.893656 | -0.667181 | 1.785379  |
| 1 | -2.891343 | -1.066171 | -1.016506 |
| 1 | -2.475116 | 1.599436  | 0.343516  |

Vibrational frequencies (cm<sup>-1</sup>)

|          |         |         |
|----------|---------|---------|
| -1055.59 | 52.32   | 63.31   |
| 95.87    | 124.90  | 195.30  |
| 247.33   | 269.67  | 332.31  |
| 389.74   | 423.60  | 447.69  |
| 471.96   | 504.72  | 535.04  |
| 572.75   | 612.03  | 634.80  |
| 713.82   | 723.40  | 764.53  |
| 770.52   | 793.57  | 832.59  |
| 850.17   | 893.84  | 906.96  |
| 983.70   | 998.84  | 1004.29 |
| 1031.59  | 1056.02 | 1073.49 |
| 1099.06  | 1124.27 | 1158.36 |
| 1176.16  | 1214.05 | 1229.39 |
| 1264.40  | 1295.67 | 1327.78 |
| 1341.23  | 1359.13 | 1395.27 |
| 1494.87  | 1516.48 | 1537.76 |
| 1607.48  | 1635.74 | 1681.03 |
| 1939.43  | 2216.71 | 3113.49 |
| 3137.83  | 3167.07 | 3179.54 |
| 3184.17  | 3187.03 | 3202.63 |
| 3406.13  | 3532.65 | 3941.10 |

### VIII-1-i1

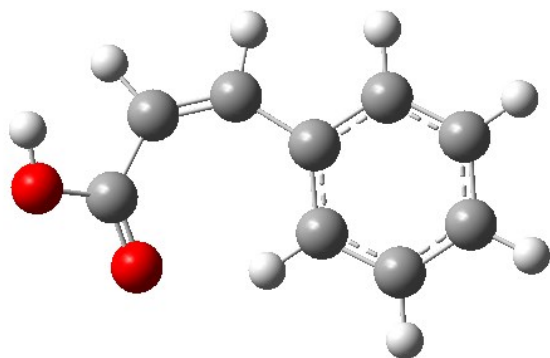

Atomic  
Number

X

Y

Z

|   |           |           |           |
|---|-----------|-----------|-----------|
| 6 | -0.532261 | 1.305152  | -0.404626 |
| 6 | -1.837236 | 1.004636  | -0.325156 |
| 6 | 0.704437  | 0.537511  | -0.195838 |
| 6 | 0.822784  | -0.854080 | -0.307269 |
| 6 | 1.850419  | 1.285573  | 0.113749  |
| 6 | 2.049872  | -1.466953 | -0.087664 |
| 6 | 3.070020  | 0.668045  | 0.344045  |
| 6 | 3.171978  | -0.715533 | 0.244390  |
| 1 | -0.333866 | 2.353556  | -0.619280 |
| 1 | -0.040227 | -1.445010 | -0.574456 |
| 1 | 1.775023  | 2.365851  | 0.182406  |
| 1 | 2.128254  | -2.543485 | -0.181711 |
| 1 | 3.939875  | 1.263913  | 0.592928  |
| 1 | 4.123928  | -1.204259 | 0.414990  |
| 6 | -2.489286 | -0.288284 | 0.018032  |
| 8 | -3.669269 | -0.144370 | 0.666158  |
| 8 | -2.094598 | -1.386715 | -0.242990 |
| 1 | -3.815540 | 0.777637  | 0.895591  |
| 1 | -2.530874 | 1.824077  | -0.493795 |

### IX-ts

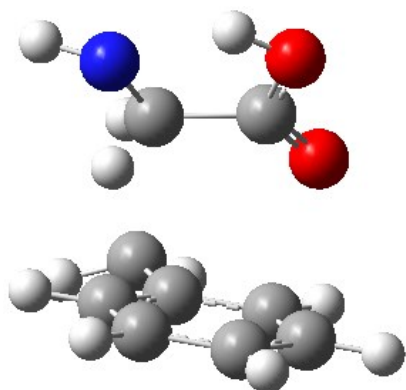

| Atomic Number | X         | Y         | Z         |
|---------------|-----------|-----------|-----------|
| 7             | -1.816191 | 1.567001  | -0.995434 |
| 6             | -0.454974 | 0.834570  | 1.368016  |
| 6             | -2.059099 | 0.824206  | 0.157621  |
| 6             | 0.802319  | 0.361925  | 0.738341  |
| 6             | 1.708799  | 1.279972  | 0.197092  |
| 6             | 1.057656  | -1.008375 | 0.597477  |
| 6             | 2.854471  | 0.841166  | -0.454869 |
| 6             | 2.203107  | -1.441881 | -0.054108 |
| 6             | 3.104462  | -0.520245 | -0.580548 |
| 1             | -0.927708 | 0.113215  | 2.027439  |
| 1             | -0.389355 | 1.821840  | 1.828694  |

|   |           |           |           |
|---|-----------|-----------|-----------|
| 1 | 1.517843  | 2.343416  | 0.299069  |
| 1 | 0.351787  | -1.725918 | 1.001150  |
| 1 | -0.904470 | 1.346393  | 0.110008  |
| 1 | -2.152829 | 2.518638  | -0.893671 |
| 1 | 3.551366  | 1.562587  | -0.863904 |
| 1 | 2.394035  | -2.503681 | -0.151363 |
| 1 | 3.998450  | -0.863561 | -1.086773 |
| 6 | -2.074933 | -0.688230 | -0.129879 |
| 8 | -1.895457 | -0.935208 | -1.407643 |
| 8 | -2.230280 | -1.511384 | 0.727378  |
| 1 | -1.809928 | -0.040562 | -1.828054 |
| 1 | -2.760812 | 1.132707  | 0.932721  |

Vibrational frequencies (cm<sup>-1</sup>)

|          |           |         |
|----------|-----------|---------|
| -1975.10 | 31.32     | 51.21   |
| 84.65    | 100.46    | 180.73  |
| 246.45   | 325.10    | 379.65  |
| 414.89   | 424.42    | 443.59  |
| 473.82   | 529.44    | 544.37  |
| 581.99   | 631.93    | 694.95  |
| 716.19   | 755.40    | 786.77  |
| 806.98   | 835.68    | 860.40  |
| 872.93   | 909.64    | 941.92  |
| 990.57   | 1004.83   | 1017.95 |
| 1027.49  | 1063.46   | 1083.72 |
| 1119.17  | 1135.85   | 1155.61 |
| 1173.34  | 1180.40   | 1210.17 |
| 1217.60  | 1259.67   | 1272.86 |
| 1331.05  | 1361.72   | 1430.97 |
| 1469.89  | 1496.55   | 1497.95 |
| 1538.50  | 1654--.16 | 1676.77 |
| 1904.22  | 2143.87   | 3106.45 |
| 3127.79  | 3192.61   | 3202.17 |
| 3204.73  | 3211.85   | 3221.41 |
| 3230.72  | 3329.62   | 3573.50 |

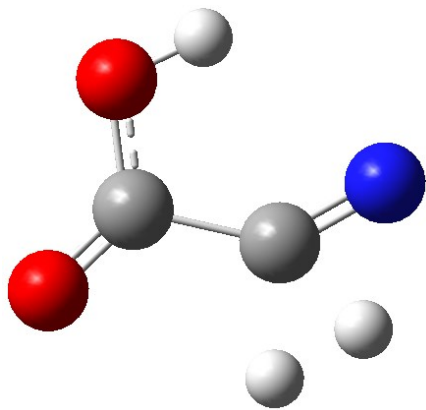

| Atomic Number                               | X         | Y         | Z         |
|---------------------------------------------|-----------|-----------|-----------|
| 7                                           | 1.942944  | 0.197864  | 0.000011  |
| 6                                           | 0.878557  | -0.405958 | -0.000058 |
| 1                                           | 0.826143  | -1.779771 | -0.000100 |
| 1                                           | 1.725523  | -1.281086 | 0.000236  |
| 6                                           | -0.605326 | -0.068954 | -0.000010 |
| 8                                           | -0.772814 | 1.245872  | 0.000003  |
| 8                                           | -1.464182 | -0.888558 | 0.000017  |
| 1                                           | 0.104311  | 1.666766  | 0.000035  |
| Vibrational frequencies (cm <sup>-1</sup> ) |           |           |           |
| -2234.32                                    | 125.78    |           | 247.20    |
| 253.79                                      | 512.63    |           | 566.08    |
| 645.66                                      | 703.71    |           | 822.30    |
| 871.83                                      | 1080.03   |           | 1234.28   |
| 1402.24                                     | 1812.72   |           | 1902.90   |
| 1957.43                                     | 2491.55   |           | 3719.53   |

### IX-1-i1

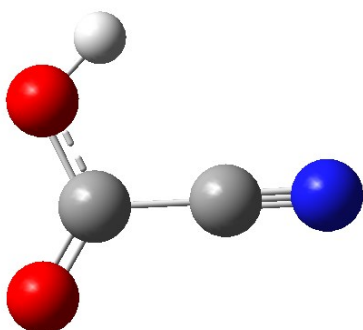

| Atomic Number | X         | Y         | Z         |
|---------------|-----------|-----------|-----------|
| 7             | 2.129518  | 0.002864  | 0.000521  |
| 6             | 0.983758  | -0.058410 | -0.000869 |
| 6             | -0.498331 | -0.126864 | -0.000194 |
| 8             | -1.088665 | 1.068877  | 0.000213  |

|   |           |           |           |
|---|-----------|-----------|-----------|
| 8 | -1.083761 | -1.155203 | 0.000175  |
| 1 | -0.439775 | 1.782198  | -0.000375 |

### IX-1-ts2

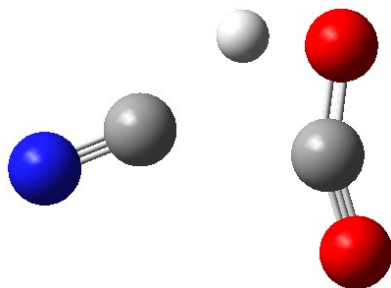

| Atomic Number | X         | Y         | Z         |
|---------------|-----------|-----------|-----------|
| 7             | -2.287733 | -0.237834 | 0.000000  |
| 6             | -1.216288 | 0.196911  | -0.000000 |
| 6             | 0.891038  | -0.084941 | -0.000000 |
| 8             | 1.043327  | 1.143454  | 0.000000  |
| 8             | 1.210599  | -1.175001 | -0.000000 |
| 1             | -0.065782 | 1.245395  | -0.000002 |

Vibrational frequencies (cm<sup>-1</sup>)

|          |         |         |
|----------|---------|---------|
| -1549.41 | 121.15  | 167.61  |
| 357.82   | 462.83  | 606.79  |
| 845.05   | 954.51  | 1302.68 |
| 2027.44  | 2303.35 | 2395.62 |

### X-1-ts1

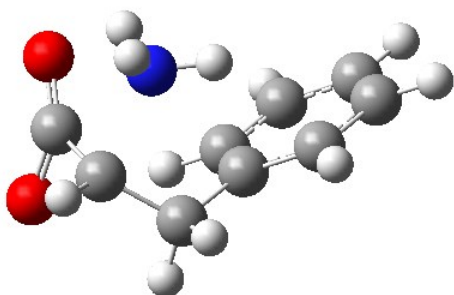

| Atomic Number | X         | Y         | Z         |
|---------------|-----------|-----------|-----------|
| 7             | -1.211184 | 1.864718  | -1.135226 |
| 6             | -0.603707 | 0.714078  | 1.363695  |
| 6             | -1.828504 | 0.556310  | 0.500455  |
| 6             | 0.677621  | 0.239635  | 0.720122  |
| 6             | 1.701614  | 1.143398  | 0.439098  |
| 6             | 0.854608  | -1.105610 | 0.391160  |
| 6             | 2.878407  | 0.719344  | -0.170669 |



|   |           |           |           |
|---|-----------|-----------|-----------|
| 6 | 2.027527  | -1.529296 | -0.220830 |
| 6 | 3.041099  | -0.619475 | -0.505238 |
| 1 | -0.803277 | 0.148982  | 2.278317  |
| 1 | -0.518858 | 1.764798  | 1.646456  |
| 1 | 1.582378  | 2.187892  | 0.712849  |
| 1 | 0.070069  | -1.820261 | 0.615985  |
| 1 | -0.231128 | 2.129976  | -1.146525 |
| 1 | -1.772554 | 2.662814  | -1.411740 |
| 1 | 3.666565  | 1.433070  | -0.379169 |
| 1 | 2.149628  | -2.574976 | -0.475691 |
| 1 | 3.954831  | -0.953967 | -0.981308 |
| 6 | -2.088520 | -0.647830 | -0.291468 |
| 8 | -1.979898 | -0.962285 | -1.449415 |
| 8 | -2.463109 | -1.178731 | 0.799552  |
| 1 | -1.340700 | 1.116632  | -1.817510 |
| 1 | -2.695486 | 1.156804  | 0.745869  |

Vibrational frequencies (cm<sup>-1</sup>)

|         |         |         |
|---------|---------|---------|
| -538.36 | 43.64   | 68.45   |
| 101.63  | 114.30  | 154.56  |
| 200.17  | 216.61  | 246.96  |
| 333.73  | 337.77  | 406.45  |
| 419.86  | 472.12  | 507.73  |
| 585.38  | 592.30  | 626.39  |
| 640.94  | 723.99  | 754.76  |
| 773.84  | 840.18  | 880.87  |
| 898.98  | 956.23  | 958.99  |
| 992.70  | 1009.52 | 1019.76 |
| 1033.18 | 1065.30 | 1113.68 |
| 1126.44 | 1163.66 | 1179.24 |
| 1208.08 | 1214.19 | 1236.22 |
| 1319.58 | 1329.27 | 1353.76 |
| 1368.79 | 1410.49 | 1469.28 |
| 1499.46 | 1543.40 | 1641.43 |
| 1661.06 | 1682.56 | 1684.74 |
| 1937.58 | 3083.97 | 3131.26 |
| 3178.18 | 3202.12 | 3208.86 |
| 3218.90 | 3229.49 | 3231.35 |
| 3461.53 | 3589.73 | 3641.41 |

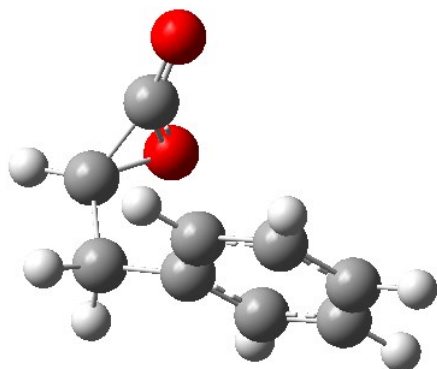

| Atomic Number | X         | Y         | Z         |
|---------------|-----------|-----------|-----------|
| 6             | 0.885968  | 1.149179  | 1.103229  |
| 6             | 2.097255  | 0.531615  | 0.447359  |
| 6             | -0.415252 | 0.593964  | 0.579826  |
| 6             | -0.960206 | -0.565547 | 1.130166  |
| 6             | -1.058523 | 1.199621  | -0.497474 |
| 6             | -2.136032 | -1.103283 | 0.621270  |
| 6             | -2.235453 | 0.664555  | -1.007810 |
| 6             | -2.777317 | -0.486783 | -0.447577 |
| 1             | 0.929857  | 2.231801  | 0.952417  |
| 1             | 0.974334  | 0.970545  | 2.179002  |
| 1             | -0.456574 | -1.052564 | 1.958990  |
| 1             | -0.629217 | 2.090860  | -0.942032 |
| 1             | -2.550051 | -2.003966 | 1.057994  |
| 1             | -2.727295 | 1.144849  | -1.845048 |
| 1             | -3.694143 | -0.904987 | -0.845035 |
| 6             | 2.040293  | -0.677971 | -0.353171 |
| 8             | 2.001284  | -1.842145 | -0.543309 |
| 8             | 2.054085  | 0.444408  | -1.053157 |
| 1             | 3.065744  | 0.873257  | 0.800531  |

**XI-1-ts1**

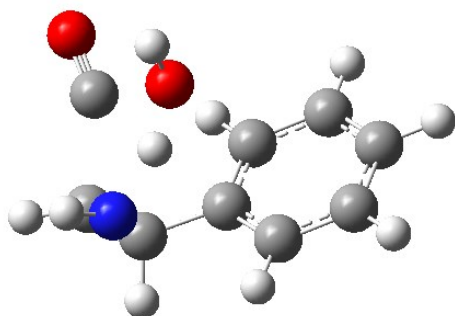

| Atomic Number | X | Y | Z |
|---------------|---|---|---|
|---------------|---|---|---|

|   |           |           |           |
|---|-----------|-----------|-----------|
| 7 | -1.668396 | 1.585922  | -0.716380 |
| 6 | -0.652133 | 0.938712  | 1.427637  |
| 6 | -1.835691 | 0.998558  | 0.470721  |
| 6 | 0.624199  | 0.453888  | 0.792422  |
| 6 | 1.356793  | 1.282201  | -0.058151 |
| 6 | 1.058706  | -0.852978 | 1.003631  |
| 6 | 2.497719  | 0.805476  | -0.690120 |
| 6 | 2.199796  | -1.332304 | 0.370639  |
| 6 | 2.920859  | -0.503029 | -0.479028 |
| 1 | -0.916038 | 0.309313  | 2.281195  |
| 1 | -0.527479 | 1.962411  | 1.796841  |
| 1 | 1.010455  | 2.293037  | -0.237998 |
| 1 | 0.495089  | -1.503385 | 1.665863  |
| 1 | -1.160346 | 0.553921  | -1.385375 |
| 1 | -2.567626 | 1.829663  | -1.121682 |
| 1 | 3.058211  | 1.455454  | -1.351797 |
| 1 | 2.524521  | -2.351701 | 0.541853  |
| 1 | 3.810616  | -0.873376 | -0.974191 |
| 6 | -1.949394 | -0.894467 | -0.003217 |
| 8 | -1.001564 | -0.591090 | -1.561506 |
| 8 | -2.382328 | -1.950612 | 0.075986  |
| 1 | -1.509115 | -0.908653 | -2.314802 |
| 1 | -2.793513 | 1.089134  | 0.991710  |

Vibrational frequencies (cm<sup>-1</sup>)

|          |         |         |
|----------|---------|---------|
| -1206.27 | 42.68   | 62.60   |
| 76.53    | 116.48  | 158.39  |
| 169.04   | 272.24  | 312.43  |
| 375.66   | 416.40  | 424.08  |
| 477.12   | 498.42  | 514.67  |
| 553.36   | 599.15  | 618.96  |
| 632.12   | 703.42  | 720.86  |
| 773.47   | 779.20  | 842.74  |
| 861.49   | 867.28  | 937.16  |
| 946.30   | 952.14  | 995.00  |
| 1017.11  | 1021.64 | 1065.10 |
| 1112.15  | 1141.93 | 1173.73 |
| 1204.55  | 1212.45 | 1224.65 |
| 1241.59  | 1326.81 | 1343.10 |
| 1354.40  | 1385.39 | 1475.74 |
| 1498.23  | 1504.40 | 1535.54 |
| 1545.03  | 1668.22 | 1690.81 |
| 1798.36  | 2113.66 | 3054.75 |
| 3093.25  | 3115.39 | 3167.50 |
| 3180.52  | 3189.71 | 3198.22 |

3206.57

3537.25

3896.07

**XI-1-ts2**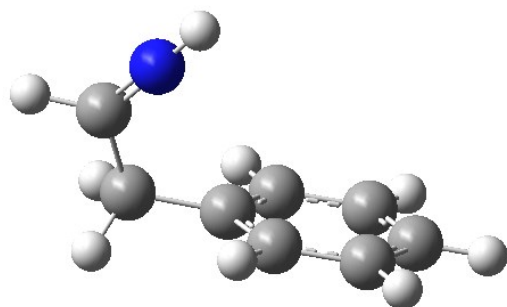

| Atomic Number                               | X         | Y         | Z         |
|---------------------------------------------|-----------|-----------|-----------|
| 7                                           | -2.363673 | -0.761973 | 1.033347  |
| 6                                           | -1.552210 | 0.682940  | -0.790710 |
| 6                                           | -2.595003 | 0.050793  | 0.140763  |
| 6                                           | -0.133926 | 0.346269  | -0.435902 |
| 6                                           | 0.353288  | -0.945733 | -0.640310 |
| 6                                           | 0.708496  | 1.293756  | 0.140618  |
| 6                                           | 1.654732  | -1.278348 | -0.288229 |
| 6                                           | 2.013323  | 0.965593  | 0.495952  |
| 6                                           | 2.490195  | -0.321579 | 0.281327  |
| 1                                           | -1.713188 | 1.765902  | -0.784110 |
| 1                                           | -1.792769 | 0.348816  | -1.807454 |
| 1                                           | -0.298417 | -1.693585 | -1.079553 |
| 1                                           | 0.339987  | 2.299955  | 0.311165  |
| 1                                           | -2.185201 | -1.410141 | 1.759252  |
| 1                                           | 2.019647  | -2.284616 | -0.457920 |
| 1                                           | 2.656842  | 1.716852  | 0.938492  |
| 1                                           | 3.506547  | -0.579012 | 0.554435  |
| 1                                           | -3.621105 | 0.407495  | -0.088783 |
| Vibrational frequencies (cm <sup>-1</sup> ) |           |           |           |
| -1149.40                                    | 31.37     | 104.99    |           |
| 123.15                                      | 254.24    | 335.27    |           |
| 413.57                                      | 474.84    | 497.23    |           |
| 633.53                                      | 677.19    | 687.54    |           |
| 719.84                                      | 735.24    | 771.57    |           |
| 841.13                                      | 869.46    | 921.05    |           |
| 942.79                                      | 995.03    | 1010.98   |           |
| 1018.03                                     | 1021.15   | 1063.01   |           |
| 1112.01                                     | 1176.69   | 1201.27   |           |
| 1205.14                                     | 1233.79   | 1317.12   |           |
| 1333.08                                     | 1357.96   | 1425.05   |           |
| 1468.96                                     | 1496.79   | 1543.82   |           |

|         |         |         |
|---------|---------|---------|
| 1662.58 | 1683.10 | 1855.92 |
| 2894.06 | 3048.47 | 3091.92 |
| 3190.52 | 3193.36 | 3204.69 |
| 3213.77 | 3224.77 | 3952.99 |
